1 **Baculovirus-vectored precision delivery of large DNA cargoes in human genomes**

2

3 Francesco Aulicino<sup>1\*</sup>, Martin Pelosse<sup>1#</sup>, Christine Toelzer<sup>1</sup>, Julien Capin<sup>1</sup>, Parisa Meysami<sup>1</sup>,  
4 Mark Simon Dillingham<sup>1</sup>, Christiane Schaffitzel<sup>1</sup> and Imre Berger<sup>1,2\*</sup>

5

6 <sup>1</sup> BrisSynBio Bristol Synthetic Biology Centre, Biomedical Sciences, School of Biochemistry,  
7 1 Tankard's Close, University of Bristol, Bristol BS8 1TD, United Kingdom

8 <sup>2</sup> Max Planck Bristol Centre for Minimal Biology, School of Chemistry, University of Bristol,  
9 Clantock's Close, Bristol BS8 1TS, United Kingdom

10

11

12

13 <sup>#</sup> Current address: Laboratoire Chimie et Biologie des Métaux CEA Grenoble, 17 Avenue des  
14 Martyrs 38054 Grenoble CEDEX 09 France

15

16 <sup>\*</sup> Correspondence to [francesco.aulicino@bristol.ac.uk](mailto:francesco.aulicino@bristol.ac.uk) and [imre.berger@bristol.ac.uk](mailto:imre.berger@bristol.ac.uk)

17

18 **Abstract:**

19 Precise gene editing and genome engineering by CRISPR technology requires simultaneous  
20 delivery of multiple DNA-encoded components into living cells rapidly exceeding the cargo  
21 capacity of currently utilized viral vector systems. Here we exploit the unmatched heterologous  
22 DNA cargo capacity of baculovirus to resolve this bottleneck. We implement hybrid DNA  
23 techniques (MultiMate) for rapid and error-free assembly of currently up to 25 functional DNA  
24 modules in a single baculoviral vector enabling CRISPR-based genome engineering. Utilizing  
25 homology-independent targeted integration (HITI), we achieve up to 30% correct genome  
26 interventions in human cells, including precision docking of large DNA payloads in the *ACTB*  
27 locus. We demonstrate baculovirus-vectored delivery of prime-editing toolkits for seamless  
28 DNA search-and-replace interventions achieving, with a single vector, highly efficient  
29 cleavage-free trinucleotide insertion in the *HEK3* locus without any detectable indels. Our  
30 approach thus unlocks a wide range of editing and engineering applications in human cell  
31 genomes.

32

33 **Main**

34 CRISPR/Cas represents a game-changing gene editing tool<sup>1</sup>. A programmable DNA nuclease  
35 (Cas9) is precisely guided to a specific DNA locus by means of a short single guide RNA  
36 (sgRNA) to elicit double strand DNA breaks (DSBs) subsequently repaired through non-  
37 homologous end-joining (NHEJ) introducing small insertions-deletions (indels), giving rise to  
38 frameshift mutations and functional gene knock-outs (KOs)<sup>1</sup>. Unpredictable indels that  
39 likewise occur are however undesirable in the context of therapeutic gene editing. Precise gene  
40 editing in contrast is typically achieved through homology directed repair (HDR) by providing  
41 a DNA template flanked by homology arms of variable length<sup>1,2</sup>, resulting in precise gene  
42 correction or knock-in (KIs)<sup>1</sup>. HDR activity however is intrinsically low and mostly restricted  
43 to S/G2 cell cycle phases<sup>3-5</sup>, reducing the efficiency of the desired gene editing outcome.  
44 Significant effort is being made to increase the efficacy of CRISPR-HDR by means of small-  
45 molecule NHEJ inhibitors<sup>6</sup>, cell cycle stabilised Cas9 variants<sup>7,8</sup> and other strategies<sup>9,10</sup>,  
46 however, gene editing efficiency *in vivo* has remained low.

47 More recently, homology-independent targeted integration (HITI), was shown to  
48 efficiently induce base pair precise KIs in both dividing and non-dividing cells<sup>11-13</sup> by  
49 exploiting NHEJ and Cas9 cleaved donors, with exciting potential for gene editing applications  
50 *in vivo*<sup>11,14</sup>. Moreover, single base substitutions can also be achieved by using base editors  
51 (BEs) involving catalytically impaired Cas9 variants fused to cytosine or adenine deaminase  
52 <sup>15,16</sup>and, more recently, prime editors (PEs) using Cas9 nickase fused to reverse transcriptase,  
53 achieving genomic interventions with little to no indels and reducing the risks associated with  
54 DSBs<sup>17</sup>. BE, PE and HITI share in common a reliance on multiple functional DNA and protein  
55 elements that must be simultaneously delivered into target cells. This limits their applicability,  
56 in particular for future *bona fide* therapeutic interventions that necessitate a systemic approach  
57 and where co-transfection of plasmids and proteins, and likewise co-infection of viral vectors,

58 will be problematic or unfeasible. In summary, the large DNA cargo capacity required for  
59 implementing these next-generation genomic interventions *in vivo* stands at odds with the  
60 limited cargo capacity of available technology, including the currently dominating adeno-  
61 associated virus (AAVs) and lentivirus (LVs) vector systems<sup>18</sup>. In marked contrast, baculoviral  
62 vectors (BVs) have a heterologous DNA cargo capacity far exceeding AAV and LV<sup>18-20</sup>. BVs,  
63 suitably pseudotyped to alter host cell tropism, are already widely used to transduce  
64 mammalian cells and living organisms<sup>19-22</sup>. We demonstrated in a proof of concept that BV is  
65 suitable for CRISPR-HDR mediated small (~0.7 kb) DNA insertions with low efficacy  
66 (~5%)<sup>19,23</sup>, as would be expected for HDR<sup>3-5</sup>.

67 Here we unlock baculovirus as a vector of choice for next-generation genome  
68 intervention approaches, fully exploiting its unprecedented DNA cargo capacity and versatility.  
69 We implement and deploy state-of-the-art DNA assembly technology (MultiMate) for error-  
70 free bottom-up assembly of multifunctional DNA circuitry comprising the DNA cargo to be  
71 inserted as well as all the DNA encoding all CRISPR modalities required to achieve highly  
72 efficient genome intervention in a baculovirus-vectored approach.

73

## 74 **Results**

75 We had previously developed methods to rapidly assemble functional DNA elements into  
76 multicomponent circuitry in baculoviral vectors<sup>24-26</sup>. Here, we optimized and fine-tuned our  
77 approach by incorporating time-tested MultiSite Gateway recombination modalities to  
78 assemble with ease currently up to 25 distinct DNA elements of various sizes (**Fig.1a,**  
79 **Extended Data Fig.1a-e, Supplementary Methods**), importantly aiming to significantly  
80 reduce prokaryotic elements carried over into the baculovirus which can compromise vector  
81 integrity during manufacturing<sup>27</sup> (**Extended Data Fig.1f**). We validated the MultiMate system  
82 by expressing the eight subunits of human chaperonin CCT/TRiC complex<sup>28</sup> in insect cells

83 from a BV comprising MultiMate assembled DNA (23 kb) (**Extended Data Fig.1g-j**). We  
84 then assessed MultiMate to efficiently deliver large multicomponent DNAs for expression and  
85 live cells imaging of up to 7 fluorescently labelled proteins (MultiMate-Rainbow) in human  
86 cells (**Fig.1b, Extended Data Fig.2a**). MultiMate assembly yielded remarkably low error rates  
87 validating our approach (**Extended Data Fig.2b**). We deployed BVs harbouring 18 and 23.4  
88 kb of MultiMate assembled functional DNA to efficiently transduce HEK293T, HeLa, H4 and  
89 SH-SY5Y leading to homogeneous expression and correct subcellular localization of all  
90 fluorescently labelled proteins (**Fig.1b, Extended Data Fig.2c**). Moreover, we created  
91 MultiMate-CellCycle (9.1 kb) as an improved cell cycle tracking tool implementing FUCCI  
92 reporters<sup>29</sup> as well as H2B-iRFP expression for accurate transduction efficiency monitoring  
93 and cell cycle stage assessment (**Fig.2c, Extended Data Fig.2d,e**). MultiMate-CellCycle BVs  
94 efficiently transduced HEK293T, HeLa, H4 and SH-SY5Y cells highlighting differences in  
95 their respective cell cycle progressions (**Extended Data Fig.2f**) and enabling 12-hrs time lapse  
96 imaging on living HeLa cells, allowing cell cycle tracking also during FUCCI-unstained stages  
97 (M-G1 transition) (**Fig1.c, Supplementary Video 1**). These results comprehensively validate  
98 the MultiMate assembly platform enabling a wide range of baculovirus-vectored applications.  
99

## 100 **Baculovirus-vectored homology independent targeted integration (HITI)**

101 To date, baculovirus-vectored gene editing approaches were confined to CRISPR-HDR of  
102 small insert DNAs with low efficacy<sup>19,22,23</sup>. HITI toolkits using a viral vector required donor  
103 and Cas9/sgRNA to be split between two AAVs due to their limited cargo capacity<sup>11</sup>, restricting  
104 successful gene editing to the fraction of co-infected cells. Moreover, manufacturing complete  
105 ‘all-in-one’ HITI vectors is not possible when viral packaging is performed in mammalian cells  
106 (typically HEK293T for AAV, LV), because simultaneous expression of Cas9 and sgRNA  
107 would inevitably excise the HITI donor, fatally compromising virus production. In marked

108 contrast, BVs are manufactured in insect cells, where the mammalian promoters controlling  
109 Cas9 and sgRNA expression are silent and all-in-one HITI construct packaging into the BV is  
110 thus entirely feasible.

111 To minimise unpredictable indels and maximise correctly-edited alleles, we sought to  
112 analyse and compare HDR and HITI-2c<sup>11</sup> strategies by targeting the intronic  $\beta$ -actin (*ACTB*)  
113 locus, introducing a synthetic C-terminal exon fused to mCherry and a self-cleaving peptide  
114 (T2A)<sup>30</sup> followed by a puromycin selection cassette (**Fig.2a**). We eliminated any possibility of  
115 leaky expression by outfitting our DNAs with the Cas9 inhibitor AcrII4<sup>31</sup> under control of a  
116 dual prokaryotic and baculoviral promoter (J23119-polH). An additional module expressing  
117 eGFP under the constitutive CMV promoter was added to track transduction efficiency. Despite  
118 comparable transduction of HEK293T cells, Multimate-HITI-2c resulted in a 3- to 4-fold  
119 higher percentage of mCherry+ cells compared to Multimate-HDR (**Fig.2b-c, Extended Data**  
120 **Fig.3h**). The BV backbone was rapidly diluted as we expected, while mCherry+ cells were  
121 stably maintained over time (**Fig.2b-c**) with absolute gene editing efficiencies reaching 5%  
122 (HDR) and 20% (HITI-2c) (**Fig.2c**). Notably, when compared to plasmid transfection,  
123 baculovirus-vectored delivery increased gene editing efficiency up to 4-fold regardless of the  
124 approach (**Extended Data Fig.3a-c**). To confirm correct gene editing, BV transduced cells  
125 were selected with puromycin and then expanded in the absence of selective pressure,  
126 demonstrating stably maintained mCherry expression in close to all (>98%) cells (**Fig.2d**).  
127 Successful editing was confirmed by PCR genotyping (**Extended Data Fig.3e**), the expected  
128 mCherry subcellular localization (**Fig.2e, Extended Data Fig.3f**) and the predicted  
129 ACTB::mCherry molecular weight (68 kDa) in western blot (**Fig.2f, Extended Data Fig.3g**).  
130 MultiMate-HITI-2c ACTB outperformed HDR editing in all BV transduced cell lines  
131 (**Extended Data Fig.3h**). For optimal efficacy, we prepared VSV-G pseudotyped BVs<sup>19</sup> and  
132 transduced HEK293T, HeLa, H4 and SH-SY5Y at different multiplicities of transduction

133 (MOT) achieving higher transduction (up to 100%) and editing efficiencies (up to 30%)  
134 depending on the cell line (**Fig.2h, Extended Data Fig.3i**). To our best knowledge this is the  
135 first assembly and delivery platform to enable efficient homology independent targeted  
136 integration in mammalian cells using a single all-in-one viral vector.

137

### 138 **Safe-harbour integration of large DNA payloads**

139 Precision docking of large multicomponent DNA circuitry in mammalian genomes is a  
140 prerequisite for *bona fide* genome engineering, but remains an impeding challenge for currently  
141 available viral delivery systems which are constrained by their intrinsic packaging limitations  
142 (AAV: ~4 kb; LV: ~8 kb)<sup>18,20</sup>. We assessed the aptitude of our system for precision DNA  
143 docking exploiting MultiMate-HITI-2c (**Supplementary Methods**). We used a new Cre  
144 insertion site to generate a series of HITI-2c payloads ranging from 4.7 kb to 18 kb with  
145 mTagBFP as a transduction efficiency reporter, resulting in all-in-one MultiMate plasmids of  
146 up to 30 kb (**Fig.3a**). Transduction with EMBacY BV<sup>32</sup> markedly outcompeted plasmid  
147 transfection and editing in HEK293T (**Extended Data Fig.4a-d**). Upon puromycin selection,  
148 cells remained >98% mCherry+ (**Extended Data Fig.4e**) confirming precise 5'-end  
149 integration. We observed silencing of the 3'-end fluorescent marker correlated with cargo size,  
150 which we could fully restore by hygromycin selection (**Fig.3b, Extended Data Fig.4f**). We  
151 confirmed correct integration by PCR genotyping and Sanger sequencing (**Fig.3c,d**). We  
152 deployed MultiMate-HITI-2c 18K-CGH (30 kb) for baculovirus-vectored delivery with VSV-  
153 G pseudotyped BV achieving 100% transduction efficiency in both HEK293T and SH-SY5Y  
154 giving rise to 20% and 30% absolute genomic insertion efficiency, respectively (**Fig.3e**). Of  
155 note, mCherry expression remained constant over time in the absence of any selective pressure  
156 while silencing of 3' eGFP expression (**Fig.3f,g**) was again promptly restored by  
157 puromycin/hygromycin selection, remaining stable thereafter (**Fig.3h**). Our results

158 demonstrate that safe-harbour integration of extensive DNA payloads with base-pair precision  
159 can be achieved with high-efficiency using all-in-one MultiMate-HITI-2c BVs, setting the  
160 stage for future large synthetic gene regulatory network engineering in human genomes.

161

## 162 **Highly efficient baculovirus-vectorized search-and-replace gene editing**

163 Base editors (BEs)<sup>15,16</sup> and prime editing (PEs)<sup>17</sup> are new additions to the CRISPR toolkit that  
164 could potentially correct up to 89% of the human disease-causing mutations in the absence of  
165 DNA cleavage<sup>17</sup>. PE in particular, can be harnessed to precisely edit genomes with little to no  
166 indels production. PE exploits the nickase Cas9-H840A fused to reverse transcriptase from  
167 MMLV (PE2) to make a ssDNA copy of the engineered PegRNA at the edited site, allowing  
168 for the generation of all possible point mutations, insertions (up to 44 bp) and deletions (up to  
169 80 bp) in the absence of DNA cleavage<sup>17</sup>. We chose here to insert a CTT trinucleotide in the  
170 *HEK3* locus using the prime editing enzyme PE2<sup>17</sup>. PE2 coding sequence spans 6.3 kb  
171 (excluding promoter) encoding for a 240 kDa protein that previously could be virally delivered  
172 only through multiple split-intein lentiviral vectors<sup>17</sup> due to cargo limitation, but is entirely  
173 within the packaging size of BV. We therefore assembled MultiMate-PE2 comprising PE2,  
174 *HEK3* PegRNA cassette, VSV-G (for pseudotyping), aeBlue chromoprotein<sup>33</sup> (for visual  
175 readout of virus titer) and mTagBFP (for transduction tracking) (**Fig. 4. a, Extended Data**  
176 **Fig.5a**). MultiMate-PE2 plasmid transfection resulted in 13% CTT insertion in *HEK3* as  
177 assessed by Sanger sequencing and deconvolution using ICE<sup>34</sup> (**Extended Data Fig.5b,c**).  
178 MultiMate-PE2 BVs production could be easily monitored (**Extended Data Fig.5d**) with  
179 excellent transduction efficiencies in the cell lines tested (**Fig.4b,d and Extended Data Fig.5e**).  
180 Sanger sequencing on *HEK3* locus amplicons from unsorted cells showed correct CTT editing  
181 with base-pair precision (**Fig.4c**) with correct editing contributions after deconvolution of 15-  
182 45%, depending on the cell line, and undetectable indels (**Fig.4e**). We increased the



183 transduction titer and observed a dose-dependent effect boosting correct editing events (up to  
184 45%) again without any indels detected (**Extended Data Fig.5f-i**) unlocking PE to our  
185 baculovirus-vectored approach for future, conceivably multiplexed applications including  
186 therapeutic interventions.

187

## 188 **Discussion**

189 The limited packaging capacity of currently dominating viral vectors (AAV, LV) markedly  
190 constrains precise genome editing interventions<sup>18,20</sup>. We demonstrated here the efficacy of our  
191 baculovirus-vectored approach to overcome this limitation. We developed a rapid error-free  
192 DNA assembly (MultiMate) to facilitate vector construction with a view to improve BV  
193 manufacturing. We implemented homology independent targeted integration (HITI) for precise  
194 DNA insertion achieving efficient C-terminal tagging in the *ACTB* locus, markedly  
195 outcompeting HDR efficiency. Using our approach, we demonstrated precision safe-harbour  
196 integration with outstanding efficacy of large multicomponent DNA payloads. There is no  
197 indication that we reached the cargo limit of baculovirus-vectored delivery. In fact, given the  
198 wide variation in size of naturally occurring baculoviruses<sup>35</sup> we expect that delivery of DNA  
199 cargos exceeding 100kb will likely be feasible, enabling insertion of entire metabolic pathways  
200 and gene regulatory networks in safe-harbour sites or elsewhere in genomes, additionally  
201 incorporating DNA insulator elements<sup>36,37</sup> to support sustained gene expression. Importantly,  
202 we demonstrate the utility of our approach for seamless search-and-replace gene editing by  
203 implementing recently developed prime editing (PE) technology<sup>17</sup>. Particularly PE, is  
204 considered safer when compared to HDR or HITI-2c, which both rely on DNA cleavage. Using  
205 a single baculovirus vector, we achieved PE-mediated trinucleotide insertion (CTT) in the  
206 *HEK3* locus with up to 45% efficiency in the absence of detectable indels. Taken together, our  
207 results establish baculovirus as a vector of choice for precision engineering of large DNA

208 cargoes in human genomes, and we anticipate baculovirus-vectored large-scale genome  
209 interventions, even combining safe-harbour integration with concomitant, if needed  
210 multiplexed, base or prime editing strategies, enabling complex synthetic biology and  
211 therapeutic approaches in the future.

212

## 213 **References**

- 214 1 Ran, F. A. *et al.* Genome engineering using the CRISPR-Cas9 system. *Nature*  
215 *Protocols* **8**, 2281 (2013).
- 216 2 Shy, B. R., MacDougall, M. S., Clarke, R. & Merrill, B. J. Co-incident insertion enables  
217 high efficiency genome engineering in mouse embryonic stem cells. *Nucleic Acids*  
218 *Research* **44**, 7997-8010 (2016).
- 219 3 Lieber, M. R. The Mechanism of Double-Strand DNA Break Repair by the  
220 Nonhomologous DNA End-Joining Pathway. *Annual Review of Biochemistry* **79**, 181-  
221 211 (2010).
- 222 4 Saha, J., Wang, S.-Y. & Davis, A. J. Examining DNA Double-Strand Break Repair in  
223 a Cell Cycle-Dependent Manner. *Methods Enzymol* **591**, 97-118 (2017).
- 224 5 Orthwein, A. *et al.* A mechanism for the suppression of homologous recombination in  
225 G1 cells. *Nature* **528**, 422-426 (2015).
- 226 6 Hu, Z. *et al.* Ligase IV inhibitor SCR7 enhances gene editing directed by CRISPR-  
227 Cas9 and ssODN in human cancer cells. *Cell & Bioscience* **8**, 12 (2018).
- 228 7 Gutschner, T., Haemmerle, M., Genovese, G., Draetta, Giulio F. & Chin, L. Post-  
229 translational Regulation of Cas9 during G1 Enhances Homology-Directed Repair. *Cell*  
230 *Reports* **14**, 1555-1566 (2016).
- 231 8 Yang, D. *et al.* Enrichment of G2/M cell cycle phase in human pluripotent stem cells  
232 enhances HDR-mediated gene repair with customizable endonucleases. *Scientific*  
233 *Reports* **6**, 21264 (2016).
- 234 9 Canny, M. D. *et al.* Inhibition of 53BP1 favors homology-dependent DNA repair and  
235 increases CRISPR-Cas9 genome-editing efficiency. *Nature Biotechnology* **36**, 95-102  
236 (2018).
- 237 10 Haapaniemi, E., Botla, S., Persson, J., Schmierer, B. & Taipale, J. CRISPR-Cas9  
238 genome editing induces a p53-mediated DNA damage response. *Nature Medicine* **24**,  
239 927-930 (2018).
- 240 11 Suzuki, K. *et al.* In vivo genome editing via CRISPR/Cas9 mediated homology-  
241 independent targeted integration. *Nature* **540**, 144 (2016).
- 242 12 Kelly, J. J. *et al.* A Safe Harbor-Targeted CRISPR/Cas9 Homology Independent  
243 Targeted Integration (HITI) System for Multi-Modality Reporter Gene-Based Cell  
244 Tracking. *bioRxiv*, 2020.2002.2010.942672 (2020).
- 245 13 Artegiani, B. *et al.* Fast and efficient generation of knock-in human organoids using  
246 homology-independent CRISPR-Cas9 precision genome editing. *Nature Cell Biology*  
247 **22**, 321-331 (2020).
- 248 14 Suzuki, K. & Izpisua Belmonte, J. C. In vivo genome editing via the HITI method as a  
249 tool for gene therapy. *J Hum Genet* **63**, 157-164 (2018).

- 250 15 Komor, A. C., Kim, Y. B., Packer, M. S., Zuris, J. A. & Liu, D. R. Programmable  
251 editing of a target base in genomic DNA without double-stranded DNA cleavage.  
252 *Nature* **533**, 420-424 (2016).
- 253 16 Gaudelli, N. M. *et al.* Programmable base editing of A•T to G•C in genomic DNA  
254 without DNA cleavage. *Nature* **551**, 464-471 (2017).
- 255 17 Anzalone, A. V. *et al.* Search-and-replace genome editing without double-strand breaks  
256 or donor DNA. *Nature* **576**, 149-157 (2019).
- 257 18 Sung, L.-Y. *et al.* Efficient gene delivery into cell lines and stem cells using  
258 baculovirus. *Nature Protocols* **9**, 1882-1899 (2014).
- 259 19 Mansouri, M. *et al.* Highly efficient baculovirus-mediated multigene delivery in  
260 primary cells. *Nature Communications* **7**, 11529 (2016).
- 261 20 Kalesnykas, G. *et al.* Comparative Study of Adeno-associated Virus, Adenovirus, Bacu-  
262 lovirus and Lentivirus Vectors for Gene Therapy of the Eyes. *Curr Gene Ther* **17**, 235-  
263 247 (2017).
- 264 21 Kost, T. A., Condreay, J. P. & Jarvis, D. L. Baculovirus as versatile vectors for protein  
265 expression in insect and mammalian cells. *Nat Biotechnol* **23**, 567-575 (2005).
- 266 22 Hindriksen, S. *et al.* Baculoviral delivery of CRISPR/Cas9 facilitates efficient genome  
267 editing in human cells. *PLoS One* **12**, e0179514 (2017).
- 268 23 Mansouri, M., Ehsaei, Z., Taylor, V. & Berger, P. Baculovirus-based genome editing  
269 in primary cells. *Plasmid* **90**, 5-9 (2017).
- 270 24 Bieniossek, C. *et al.* Automated unrestricted multigene recombineering for multiprotein  
271 complex production. *Nat Methods* **6**, 447-450 (2009).
- 272 25 Sari, D. *et al.* The MultiBac Baculovirus/Insect Cell Expression Vector System for  
273 Producing Complex Protein Biologics. *Adv Exp Med Biol* **896**, 199-215 (2016).
- 274 26 Nie, Y. *et al.* ACEMBL Tool-Kits for High-Throughput Multigene Delivery and  
275 Expression in Prokaryotic and Eukaryotic Hosts. *Adv Exp Med Biol* **896**, 27-42 (2016).
- 276 27 Pijlman, G. P., de Vrij, J., van den End, F. J., Vlak, J. M. & Martens, D. E. Evaluation  
277 of baculovirus expression vectors with enhanced stability in continuous cascaded  
278 insect-cell bioreactors. *Biotechnol Bioeng* **87**, 743-753 (2004).
- 279 28 Yam, A. Y. *et al.* Defining the TRiC/CCT interactome links chaperonin function to  
280 stabilization of newly made proteins with complex topologies. *Nat Struct Mol Biol* **15**,  
281 1255-1262 (2008).
- 282 29 Bajar, B. T. *et al.* Fluorescent indicators for simultaneous reporting of all four cell cycle  
283 phases. *Nature methods* **13**, 993-996 (2016).
- 284 30 Liu, Z. *et al.* Systematic comparison of 2A peptides for cloning multi-genes in a  
285 polycistronic vector. *Scientific Reports* **7**, 2193 (2017).
- 286 31 Rauch, B. J. *et al.* Inhibition of CRISPR-Cas9 with Bacteriophage Proteins. *Cell* **168**,  
287 150-158.e110 (2017).
- 288 32 Fitzgerald, D. J. *et al.* Protein complex expression by using multigene baculoviral  
289 vectors. *Nat Methods* **3**, 1021-1032 (2006).
- 290 33 Liljeruhm, J. *et al.* Engineering a palette of eukaryotic chromoproteins for bacterial  
291 synthetic biology. *Journal of Biological Engineering* **12**, 8 (2018).
- 292 34 Hsiau, T. *et al.* Inference of CRISPR Edits from Sanger Trace Data. *bioRxiv*, 251082  
293 (2018).
- 294 35 Vijayachandran, L. S. *et al.* Gene gymnastics: Synthetic biology for baculovirus  
295 expression vector system engineering. *Bioengineered* **4**, 279-287 (2013).
- 296 36 Alhaji, S. Y., Ngai, S. C. & Abdullah, S. Silencing of transgene expression in  
297 mammalian cells by DNA methylation and histone modifications in gene therapy  
298 perspective. *Biotechnology and Genetic Engineering Reviews* **35**, 1-25 (2019).

299 37 Harraghy, N., Gaussin, A. & Mermod, N. Sustained transgene expression using MAR  
300 elements. *Curr Gene Ther* **8**, 353-366 (2008).

301  
302

### 303 **Figure Legends**

304 **Figure 1. MultiMate enables rapid modular assembly of multifunctional DNA circuitry**

305 **for efficient baculovirus-vectored delivery in human cells. a**, MultiMate assembly platform

306 in a schematic view. Symbols are listed (left panel). attL/R flanked DNA from ENTR plasmid

307 modules (upper box, dashed) are assembled on MultiBac-DEST (lower box) and further

308 combined by *in vitro* Cre-mediated recombination to generate multicomponent MultiMate

309 plasmids, maximally eliminating prokaryotic backbone DNA sequences. MultiMate plasmids

310 are integrated in BVs customized for efficient delivery in human cells (right panel). **b**,

311 Confocal live cell imaging of H4, HeLa, HEK293T and SH-SY5Y 48 hours after transduction

312 with MultiMate-Rainbow BV (upper panel) evidencing in all cells homogeneous sustained

313 expression and correct subcellular localization of H2B-iRFP (nucleus), GTS-mTagBFP

314 (Golgi), mAG- $\beta$ -catenin (membrane and adherens junctions), EYFP-Tubulin (microtubules),

315 mTFP1-Actin (cytoskeleton), mito-mCherry (mitochondria) and CyOFP1-ER (endoplasmic

316 reticulum). Scalebar, 20  $\mu$ m. **c**, Twelve-hours confocal time-lapse imaging of live HeLa cells

317 transduced with MultiMate-CellCycle BV (snapshots, **Supplementary Video 1**). Transduced

318 cells constitutively express H2B-iRFP for DNA imaging. mAG-hGeminin and mKO2-hCdt1

319 are stabilised in S/G2 and G1 cell cycle stages, respectively. Upper panel shows G1/S

320 transition, lower panel shows a dividing cell (arrows indicate tracked cells). Scalebar, 10  $\mu$ m.

321 DNA elements, plasmid topology and cell cycle schematics are illustrated (upper panel).

322

323 **Figure 2. Baculovirus-vectored delivery of complete multicomponent CRISPR/Cas9**

324 **toolkits for homology independent targeted integration (HITI) in human cells. a**, *ACTB*

325 C-terminal tagging strategy: homologous directed repair (HDR) and homology independent

326 targeted integration (HITI-2c) elements within attL1/attR3 sites (triangles) and MultiMate-  
327 HITI-2c ACTB all-in-one DNA circuitry comprising Cas9, HITI-2c donor, sgRNA cassette,  
328 eGFP reporter. A module encoding AcrII4 Cas9 inhibitor under control of J23119 and polH  
329 promoters ensures vector stability. *ACTB* C-terminal exon is replaced with a synthetic exon,  
330 tagged with mCherry::T2A::puromycin. **b-c**, HEK293T cells transduced with MultiMate-HDR  
331 or MultiMate-HITI-2c BVs in the absence of puromycin selection, at three- and ten-days post-  
332 transduction. **b**, Representative FACS plots and **c**, histogram of flow-cytometry data. Mean  $\pm$   
333 s.d. of  $n = 3$  independent biological replicates. \*\*\* $P < 0.001$ , Student's t-test. **d-f**, HEK293T  
334 transduced with MultiMate HDR or MultiMate HITI-2c BVs after puromycin selection. **d**,  
335 Representative flow-cytometry histograms; **e**, Widefield microscopy, Scalebar=20  $\mu\text{m}$ . **f**,  
336 Western blot of total protein extracts. Anti- $\beta$ -actin antibody was used in top panel with anti-  
337 TUBULIN as loading control. **g**, Confocal images of HEK293T, HeLa, H4 and SH-SY5Y cells  
338 48 hours after transduction with MultiMate-HITI-2c BV. Scalebar is 50  $\mu\text{m}$ . **h**, Histograms of  
339 flow-cytometry data of HEK293T, HeLa, H4 and SH-SY5Y 72 hrs after transduction with  
340 MultiMate-HITI-2c VSV-G pseudotyped BVs, multiplicity of transduction (MOT) 1 and 10.  
341 Transduction efficiency= % of eGFP+ cells; absolute gene editing efficiency = % of Cherry+  
342 cells. Mean  $\pm$  s.d. of  $n=3$  independent biological replicates.

343

344 **Figure 3. Baculovirus-vectored safe-harbour homology-independent integration of large**  
345 **DNA cargoes in human genomes. a**, Safe-harbour HITI-2c strategy, HITI-2c payloads within  
346 attL1/attR3 sites (triangles) and MultiMate-HITI-2c ACTB all-in-one plasmid carrying Cas9,  
347 HITI-2c payload, sgRNA, AcrII4 and mTagBFP reporter. *ACTB* C-terminal exon is replaced  
348 with a synthetic exon, tagged with T2A::mCherry::P2A::puromycin (5' integration marker),  
349 DNA insert ranging from 4.7 to 18 kb, and distinct 3' integration markers (CMV Hygromycin  
350 (CH), CMV eGFP IRES Hygromycin (CGH) or EF1a EYFP-Tubulin IRES Hygromycin

351 (EYH)). **b-c**, HEK293T transduced with the indicated MultiMate-HITI-2c BVs after  
352 puromycin and hygromycin selection. **b**, Confocal microscopy. Scalebar, 100  $\mu$ m. **c**, PCR  
353 genotyping. Oligonucleotide pairs (colour coded arrows) for each PCR are shown, their  
354 approximative position is depicted in (a). **d**, Sanger sequencing of 5' and 3' genotyping PCRs  
355 (indicated by \* in (c)) of HEK293T transduced with MultiMate-HITI-2c 18K-CGH BV. **e**,  
356 Transduction efficiency (left histogram) and absolute gene editing efficiency (right histogram)  
357 of HEK293T and SH-SY5Y 72 hours after transduction with MultiMate-HITI-2c 18K-CGH  
358 VSV-G pseudotyped BV, derived from flow-cytometry data. Mean  $\pm$  s.d. of n = 3 independent  
359 biological replicates. **f**, Confocal microscopy pictures of HEK293T and SH-SY5Y 8 days after  
360 transduction with MultiMate-HITI-2c 18K-CGH VSV-G pseudotyped BVs in the absence of  
361 puromycin or hygromycin selection. **g**, Representative flow-cytometry plots of HEK29T at  
362 three- or 24-days post transduction with MultiMate-HITI-2c 18K-CGH VSV-G pseudotyped  
363 BV. **h**, Representative flow-cytometry plots of HEK29T transduced with MultiMate-HITI-2c  
364 18K-CGH VSV-G pseudotyped BV after puromycin (left) and puromycin/hygromycin  
365 selection (right).

366

367 **Figure 4. Highly efficient and indels-free prime-editing by using MultiMate all-in-one BV.**

368 **a**, MultiMate-PE2 for CTT insertion in the HEK3 locus in a schematic view. aeBlue is used  
369 for tracking viral amplification and VSV-G for pseudotyping BV, respectively. mTagBFP  
370 reports on transfection/transduction efficiency in human cells. **b**, Representative flow-  
371 cytometry histograms of HeLa, RPE-1 hTERT, HEK293T and SH-SY5Y cells at 24 hours post  
372 transduction with MultiMate-PE2 VSV-G pseudotyped BV. **c**, Representative genotype PCR  
373 sanger sequencing of unsorted HeLa, RPE-1 hTERT, HEK293T and SH-SY5Y cells at 96  
374 hours post transduction with MultiMate-PE2 VSV-G pseudotyped BV and their respective  
375 controls (untransduced parental cell lines). **d**, Transduction efficiencies of HeLa, RPE-1

376 hTERT, HEK293T and SH-SY5Y cells at 24 hours post transduction with MultiMate-PE2  
377 VSV-G pseudotyped BV. Mean  $\pm$  s.d. of n = 3 independent biological replicates. e, Percentage  
378 of correct editing (CTT insertion) in HeLa, RPE-1 hTERT, HEK293T and SH-SY5Y at 96  
379 hours post transduction. Data are derived from sanger sequencing deconvolution (ICE), no  
380 indels were detected in any of the conditions. Mean  $\pm$  s.d. of n = 3 independent biological  
381 replicates.

382

## 383 **Methods**

### 384 **Gibson assembly of DNA elements**

385 An extensive list of constructs maps and assembly strategies is provided in **Supplementary**  
386 **Table 1**. ENTR and DEST vectors were generated using Gibson assembly (NEB Builder Hi-  
387 Fi DNA assembly #E2621S) following manufacturer's instructions. Fragments were mixed  
388 with a backbone to insert ratio of 1:1 (>3 fragments), 1:2 (<2 fragments), 1:5 (fragments <300  
389 bp) in 5  $\mu$ l total volume and supplemented with 5  $\mu$ l 2xNEB Builder Hi-Fi mix followed by  
390 incubation at 50°C for 1 hour. 2  $\mu$ l of the assembly mix were transformed into homemade  
391 electrocompetent Top10 or Pir<sup>+</sup> *E.Coli*. followed by recovery at 37°C while shaking for 1 hour  
392 and plating on LB/agar plates with the appropriate antibiotics. All the precursors vectors  
393 generated in this study were assembled using Gibson assembly of synthetic DNA fragments,  
394 oligonucleotides, digested vectors or PCRs amplified with Herculase II fusion (Agilent#  
395 600675). A portion of pENTR-D-TOPO (Invitrogen) was used as backbone for all the pMMK  
396 ENTR vectors. attL/R sites on pMMK ENTR vectors were obtained by overlap extent PCRs  
397 of long oligonucleotides. attR1-Ccldb-Chlo-attR2 cassettes for generating pMMACE DEST  
398 were PCR amplified from pInducer-20<sup>38</sup>. pMMDS DEST was generated by replacing the  
399 Chloramphenicol cassette with Ori<sup>ColE1</sup> PCR amplified from pACEMam1<sup>19</sup>. H2B-iRFP was  
400 PCR amplified from pCAG-H2BtdiRFP-IP<sup>39</sup>, EYFP-Tubulin and mTFP1-Actin were

401 amplified from 5-colours MultiBac vectors<sup>19</sup>. pMDK 7 kb and 12 kb were generated by cloning  
402 promoterless and ATG-less portions of SMG1(NM\_015092.5) CDS. Mito-mCherry was  
403 generated by fusing mCherry from 7TGC<sup>40</sup> to the COX8 mitochondrial targeting sequence  
404 from 5-colours MultiBac vectors<sup>19</sup>. CyOFP1<sup>41</sup> fused to the endoplasmic reticulum targeting  
405 sequence (ER) was synthesised by Twist Bioscience. mAG  $\beta$ -catenin was obtained through  
406 Gibson assembly of PCR amplified mAG from pL-EF1a mAG-hGeminin<sup>42</sup>, and  $\beta$ -catenin from  
407 pL-EF1a  $\beta$ -catenin SV40 Puro<sup>43</sup>. Golgi targeting sequence (GTS) mTaBFP was synthesised by  
408 Twist Bioscience. polH or p10 cassettes were amplified from MultiBac vectors<sup>32,44</sup>, CCT  
409 isoforms were PCR amplified from synthetic vectors from GenScript. SpCas9 was PCR  
410 amplified from px459<sup>1</sup>, sgRNAs cloning was performed by overlap extent PCRs of hU6 and  
411 scaffold fragments amplified from px459<sup>1</sup>. HDR and HITI-2c templates were amplified by  
412 Gibson assembly of genomic DNA fragments, mCherry was amplified from 7TGC<sup>40</sup>, T2A Puro  
413 from px459<sup>1</sup>. sgRNAs target in the HITI-2c donors were included as overlapping ends between  
414 fragments. polH/J23119 AcrII4<sup>31</sup> was synthesised by Twist Bioscience. In the HITI-2c  
415 payloads for safe-harbour integration, mCherry T2A Puro was replaced with T2A mCherry  
416 P2A Puro. P2A was generated by overlap extent PCR of long oligonucleotides. The loxP site  
417 was PCR amplified from pACEBac1<sup>32,44</sup>, Hygromycin, IRES and eGFP were PCR-amplified  
418 from p1494 vectors<sup>45</sup>. PE2 was obtained by restriction digestion from pCMV PE2<sup>17</sup> and the  
419 HEK3 PegRNA was PCR amplified from pU6-Sp-pegRNA-HEK3\_CTT\_ins<sup>17</sup>. aeBlue<sup>33</sup> was  
420 synthesised by Twist Bioscience and VSVG-G was amplified from pMD2.G (Didier Trono lab,  
421 Addgene plasmid # 12259).

422

### 423 **LR recombination**

424 LR recombination was carried out using LR Clonase II (Thermo Fisher #11791020) or LR  
425 Clonase II plus (Thermo Fisher #12538120). Although LR Clonase II plus is specifically



426 designed for MultiSite Gateway recombination, LR Clonase II worked with comparable  
427 efficiency in our hands. LR reactions were carried out following manufacturer's instructions.  
428 One DEST and four ENTR vectors were diluted to 20 femtomoles/ $\mu$ l each in TE buffer pH 8.0  
429 (Thermo Fisher #12090015). 1 ul of each diluted vector was added to a 0.2 ml PCR tube with  
430 2 ul LR Clonase II and 3 ul TE buffer, followed by a brief spin and incubation at 25°C for 16  
431 hours. The next day the reaction was terminated by addition of 1 ul proteinase K (provided  
432 with LR Clonase II enzymes) and incubation at 37°C for 10 minutes. 2-3 ul were transformed  
433 into homemade electrocompetent Top10 or Pir<sup>+</sup> *E.Coli*, followed by 2 hours recovery at 37°C  
434 and plating on LB/agar plates with the appropriate antibiotics. LR recombination products were  
435 predicted using APE<sup>46</sup> with custom recombination reactions. To quickly load MultiMate LR  
436 reaction prototype in APE, the following code can be copied and used in Tools/Recombination  
437 Reaction Editon/New reaction from clipboard:

438 MultiMate LR Reaction for APE:

```
{ApE recombination reaction:} {MultiMate LR Reaction (1-3-4-5-2)} {{{pMMK ENTR 1} {pMMK  
ENTR 2} {pMMK ENTR 3} {pMMK ENTR 4} DEST} {attB1 0 attB3 0 attB4 0 attB5 0 attB2 1}}
```

439  
440 When imported as GenBank or Fasta files, the MultiMate LR reaction in APE will  
441 automatically recognize pMMK ENTR1-4 vectors and one DEST donors when launched  
442 through Tools/Recombination tools. For manual prediction of MultiMate assembly products, a  
443 list of the attL/R sequences and their attB products is provided in **Supplementary Table 3**.

444

#### 445 **Cre-mediated recombination of DNA elements**

446 One acceptor and one or multiple donor vectors were assembled using Cre-mediated  
447 recombination as previously described<sup>26,32,47</sup>. One acceptor and one or more donors were mixed  
448 with a ratio of 1:1.1 in distilled H<sub>2</sub>O with 0.5 ul (7.5 U) of CRE recombinase (NEB # M0298M)  
449 and 1 ul Cre buffer (provided with CRE recombinase) to a final volume of 10 ul in distilled

450 H<sub>2</sub>O. 500-1000 ng of total DNA were used for each reaction. Cre-reactions were incubated for  
451 1 hour at 37°C, followed by heat inactivation at 70°C for 10 minutes. 2-3 ul were transformed  
452 into homemade electrocompetent Top10 *E.Coli*, followed by 2 hours recovery at 37°C and  
453 plating on LB/agar plates with the appropriate antibiotics. Cre-recombination products were  
454 predicted using Cre-ACEMBLER Vers. 2.0<sup>47</sup>.

455

#### 456 **Cell culture methods**

457 Human cells (HEK293T, HeLa, H4, RPE-1 hTERT and SH-SY5Y) were purchased from  
458 ATCC and propagated as adherent cultures in 60 or 100 cm dishes in a humidified incubator  
459 (37°C, 5% CO<sub>2</sub>). For passaging cells were washed with phosphate saline buffer (DPBS, Gibco  
460 # 14190144), detached using 0.25% Trypsin (Thermo Fisher #25200056) followed by a brief  
461 incubation at 37°C, centrifuged at 300x RCF and resuspended in fresh media in a new plate at  
462 the desired concentration. Suspension cultures of Sf21 insect cells were grown in 125 ml or  
463 250 ml polycarbonate Erlenmeyer flasks with vent cap (CORNING, #431143, #431144) at  
464 27°C in a shaking incubator. Sf21 were split every 2/3 days and maintained at concentrations  
465 between 0.5-2x10<sup>6</sup> cells/ml. Origin and media formulation recipe for each cell line is reported  
466 in **Supplementary Table 4**.

467 For transfection in HEK293T, 2x10<sup>5</sup> cells/well were seeded in multi-24 wells. Transfections  
468 were carried out using Polyfect (QIAGEN #301105), following manufacturer's instructions.  
469 Briefly 500 ng of DNA were resuspended in 25 ul of Optimem (Gibco #31985062),  
470 supplemented with 5 ul Polyfect and incubated for 15 minutes at room temperature.  
471 Transfection mix was resuspended with 100 ul of complete media and added dropwise to each  
472 well. Cells were cultured for at least 48 hours before assessing the phenotype (e.g. fluorescence  
473 markers expression).

474

## 475 **Baculovirus vector amplification**

476 Assembled MultiMate vectors were shuttled on baculovirus genomes (bacmids) propagated in  
477 *E.Coli* using Tn7 transposition. 200-1000 ng of MultiMate vector were transformed in  
478 chemically competent DH10-MultiBacMam-VSV-G<sup>19</sup>, DH10-EMBacY<sup>32</sup> or commercial  
479 DH10Bac (ThermoFisher # 10361012) as previously described<sup>32</sup>. Bacteria were streaked on  
480 LB/Agar plates with Gentamycin, Kanamycin, Tetracyclin, IPTG and Bluo-Gal and incubated  
481 for 24-hours for blue-white screening. White colonies were picked and grown overnight in 3  
482 ml of LB supplemented with Gentamycin/Kanamycin to extract bacmid DNA through alkaline  
483 lysis/ethanol precipitation as previously described<sup>32,44</sup>.

484 For transfection in insect cells, 0.8-1x10<sup>6</sup> Sf21 cells/well were seeded on multi-6 well plates in  
485 3 ml of Sf-900 II media. 10 ul of purified bacmid were resuspended in 130 ul Sf-900 II media  
486 with 10 ul X-treme XP transfection reagent (Roche # 06366236001) and incubated at room  
487 temperature for 15 minutes. The entire transfection mix was added dropwise to a single well  
488 and cells were incubated at 27°C in a static incubator. V<sub>0</sub> viral stocks were harvested collecting  
489 the supernatant of transfected cells 72-96 hours post transfection as previously described<sup>19,32,47</sup>.  
490 1-3 ml of V<sub>0</sub> viral stocks was added to 10 ml of fresh Sf21 cells at 0.8x10<sup>6</sup> cells/ml. Cells were  
491 cultured in 50 ml Falcon tubes while shaking at 27°C and counted every day to monitor cell  
492 proliferation and size using Luna cell-counter (LogosBio). Successfully infected cells  
493 displayed arrested proliferation and increased average cell size (13-14 µm control, 16-20 µm  
494 infected). V<sub>1</sub> viral harvest were collected as previously described 2 days after proliferation  
495 arrest (DPA+24)<sup>19,32,47</sup> by centrifugation at 4500 x rcf. 500 µl/1 ml of V<sub>1</sub> viral stocks was added  
496 to 50 ml of fresh Sf21 cells at 0.8x10<sup>6</sup> cells/ml in 125 ml Erlenmeyer flasks and cells were  
497 cultured at 27°C in a shaking incubator. V<sub>2</sub> viral harvests were collected by centrifugation at  
498 4500 x rcf, and concentrated 20 times by high-speed centrifugation at 11000 x rcf, followed by

499 resuspension in DPBS supplemented with 3% heat inactivated FBS and 1 %Glycerol for  
500 storage at -80°C.

501

## 502 **Baculovirus vector titration and transduction**

503 For BV expressing fluorescent markers in human cells, titration was performed as previously  
504 described<sup>48</sup>. HEK293T were used to determine viral titers. Briefly  $5 \times 10^5$  cells/well were seeded  
505 in multi-48 wells plates in 200 ul of complete media. Concentrated virus was serially diluted  
506 in DPBS and 50  $\mu$ l were dispensed to each well.

507 Spinoculation (30' at 600 x rcf at 27°C) was used to enhance transduction as previously  
508 reported<sup>48</sup>. 24 hours after transduction, cells were analysed using flow-cytometry to determine  
509 the percentage of transduced cells. TU/ml values from dilutions giving less than 20%  
510 transduction efficiencies were averaged to estimate the titer as previously described<sup>49</sup> and using

511 **Supplementary Equation 1**. For experiments in which different viral titers were used,  
512 multiplicity of transduction (MOT) was calculated as  $TU/Cn$ .

513

## 514 **Confocal and widefield imaging**

515 Confocal images were acquired using a Leica Sp8 equipped with 405, 458, 476, 488, 496, 514,  
516 561, 594, 633 nm laser lines and 37°C stage. For time lapse confocal experiments on living  
517 cells the stage was supplemented with 5% CO<sub>2</sub>. For higher magnification, cells were plated on  
518 Lab-Tek borosilicate multi-8 wells (Thermo Fisher # 155411). For experiments in which  
519 transduced cells expressed more than 3 different fluorochromes, laser intensity and detection  
520 filters were adjusted to reduce spectral overlap using individual fluorescence controls  
521 transfections. Widefield and phase contrast images were acquired using a Leica DMI6000  
522 equipped with excitation/emission filters optimised for DAPI, GFP, Rhodamine, Texas Red  
523 and Far red.

524

### 525 **Flow cytometry analysis**

526 For flow-cytometry analysis cells were trypsinised and resuspended in complete media  
527 supplemented with 3 $\mu$ M DRAQ7 (Abcam #ab109202) to counterstain dead cells. Cells were  
528 analysed on a BD Fortessa, fluorochromes were detected as follow: eGFP and EYFP (FITC-  
529 A), mCherry (PECF594-A), mTagBFP (BV421-A), DRAQ7 (AlexaFluor700-A). SSC-A and  
530 FSC-A were used to discriminate single cells and cell populations by size. FlowJo X was used  
531 to analyse FCS files. All data represented are percentages of live single cells (DRAQ7-).

532

### 533 **PCR genotyping, Sanger sequencing and deconvolution**

534 Genomic DNA was extracted with QIAamp DNA Mini Kit (QIAGEN # 51306) following  
535 manufacturer's instruction. A list of the predicted gene editing outcome sequences and  
536 genotyping oligos is provided in **Supplementary Table 2**. PCRs were performed using  
537 KAPA2G Fast Genotyping mix (SigmaAldrich # KK5621) following manufacturer's  
538 instruction. Amplicons were run on 0.8% agarose gels, purified using QIAquick Gel Extraction  
539 Kit (QIAGEN # 28706) and eluted in distilled ddH<sub>2</sub>O. For Sanger sequencing 15  $\mu$ l of purified  
540 PCR at 5-10 ng/ $\mu$ l were mixed with 2  $\mu$ l of diluted (10  $\mu$ M) sequencing primer and sent to an  
541 external sequencing service (Eurofins). Electropherograms (.ab1) from parental and transduced  
542 cells were fed into ICE<sup>34</sup> from Synthego for sequence deconvolution and indels/knock-in  
543 estimation.

544

### 545 **Western blot analysis**

546 Total protein extracts from HEK293T were obtained by lysing the cells with ice-cold RIPA  
547 Buffer (Thermo Fisher # 89901) supplemented with protease inhibitors (Thermo Fisher #  
548 78429) for 30' on ice. Insoluble material was pelleted by centrifugation at 16000 x ref at 4°C

549 for 5 minutes. Total protein extracts from insect cells were obtained as previously described<sup>32</sup>.  
550 Proteins concentration were determined using Nanodrop. 10 µg protein/sample were stained  
551 with Laemmli buffer, boiled at 95°C for 5 minutes, separated using pre-cast NuPage 4-12%  
552 Bis-Tris SDS-Gels (Thermo Fisher # NP0321BOX) and transferred to PVDF membranes using  
553 iBlot. Membranes were blocked with 5% non-fat dry milk in T-TBS (50 mM Tris-Cl, pH 7.6,  
554 150 mM NaCl, 0.5% Tween) for 1 hour at room temperature. Membranes were incubated with  
555 primary antibodies diluted 1:1000 in T-TBS 5% milk overnight at 4°C while rocking, followed  
556 by 2 T-TBS washes and incubation with HRP-conjugated secondary antibody diluted 1:2000  
557 in T-TBS 5% milk for 1 hour at room temperature. Membranes were washed again with T-TBS  
558 and developed using Pierce ECL reagents (Thermo Fisher # 34579) following manufacturer's  
559 instructions. Finally, membranes were imaged using MyECL Imager.

560 A list of the primary and secondary antibodies used is provided in **Supplementary Table 5**.

561

### 562 **CCT/TriC complex purification**

563 Recombinant MultiMate-CCT BV was produced as previously described<sup>32</sup> and used to infect  
564 Sf21 insect cells at a cell density of  $1.0 \times 10^6$ /mL in Sf-900 II medium. Cells were harvested 72-  
565 96 h after proliferation arrest by centrifugation at 1,000 g for 15 minutes. Cell pellets were  
566 resuspended in lysis buffer (50 mM HEPES-NaOH, 200 mM KCl, 10 mM Imidazole, 20 %  
567 Glycerol, pH 7.5, supplemented with EDTA-free protease inhibitor (Sigma-Aldrich) and  
568 Benzonase (Sigma-Aldrich)) and lysed by short sonication. The lysate was cleared by  
569 centrifugation at 18,000 rpm, 4°C, in a F21-8x50y rotor (Thermo Fisher Scientific) for 60  
570 minutes. The supernatant was loaded on a TALON column (Generon), equilibrated in TALON  
571 A buffer (50 mM HEPES-NaOH, 200 mM KCl, 10 mM Imidazole, 20 % Glycerol, pH 7.5)  
572 with a peristaltic pump. The column was washed with ten column volumes (CV) of TALON A  
573 buffer before eluting the bound protein complex with a step gradient of TALON B buffer (50

574 mM HEPES-NaOH, 200 mM KCl, 250 mM Imidazole, 20 % Glycerol, pH 7.5). The CCT  
575 protein complex was buffer exchanged in Heparin A buffer (50 mM HEPES-NaOH, 100 mM  
576 KCl, 10 % Glycerol, pH 7.5) while concentrating. It was then subjected to a Heparin column  
577 (GE Healthcare) and eluted with a 1M KCl gradient in Heparin A buffer. Fully formed  
578 complexes and disassembled subunits were separated on a Superose 6 10/300 column (GE  
579 Healthcare) equilibrated in SEC buffer (20 mM HEPES-NaOH, 200 mM KCl, pH 7.5, 1 mM  
580 DTT, 10% Glycerol). Peak fractions were pooled and concentrated and the purity of the CCT  
581 complex was analyzed by SDS-PAGE.

582

### 583 **Electron microscopy**

584 For electron microscopy, copper grids with carbon coating (300 mesh, Electron Microscopy  
585 Sciences) were glow discharged for 10 s, and 5  $\mu$ L of purified CCT was placed on the grids for  
586 1 min. Afterwards the grid was washed for 15 s and floated onto a drop of filtered 3 % uranyl  
587 acetate for 1 min. Excess solution on the grids was blotted off using filter paper between each  
588 step. Grids were visualized under a FEI Tecnai 20 transmission electron microscope (TEM),  
589 and digital micrographs were taken using a FEI Eagle 4Kx4K CCD camera. Particle picking  
590 and processing was performed using RELION 2<sup>50,51</sup>, 2D class averages were generated without  
591 applying symmetry or reference models.

592

### 593 **Data availability statement**

594 All plasmid sequences are provided in **Supplementary Table 1**. MultiMate-CellCycle,  
595 MultiMate-Rainbow and MultiMate-HITI-2c ACTB reagents will be made available for  
596 distribution by Addgene. All other reagents are available from the authors upon reasonable  
597 request.

598

## 599 **Methods References**

- 600  
601 38 Meerbrey, K. L. *et al.* The pINDUCER lentiviral toolkit for inducible RNA interference  
602 in vitro and in vivo. *Proceedings of the National Academy of Sciences* **108**, 3665 (2011).  
603 39 Miyanari, Y., Ziegler-Birling, C. & Torres-Padilla, M.-E. Live visualization of  
604 chromatin dynamics with fluorescent TALEs. *Nature Structural & Molecular Biology*  
605 **20**, 1321-1324 (2013).  
606 40 Fuerer, C. & Nusse, R. Lentiviral Vectors to Probe and Manipulate the Wnt Signaling  
607 Pathway. *PLOS ONE* **5**, e9370 (2010).  
608 41 Chu, J. *et al.* A bright cyan-excitable orange fluorescent protein facilitates dual-  
609 emission microscopy and enhances bioluminescence imaging in vivo. *Nature*  
610 *Biotechnology* **34**, 760 (2016).  
611 42 De Jaime-Soguero, A. *et al.* Wnt/Tcf1 pathway restricts embryonic stem cell cycle  
612 through activation of the Ink4/Arf locus. *PLOS Genetics* **13**, e1006682 (2017).  
613 43 Aulicino, F. *et al.* Canonical Wnt pathway controls mESCs self-renewal through  
614 inhibition of spontaneous differentiation via  $\beta$ -catenin/TCF/LEF functions. *bioRxiv*,  
615 661777 (2019).  
616 44 Berger, I., Fitzgerald, D. J. & Richmond, T. J. Baculovirus expression system for  
617 heterologous multiprotein complexes. *Nat Biotechnol* **22**, 1583-1587 (2004).  
618 45 Aulicino, F., Theka, I., Ombrato, L., Lluís, F. & Cosma, M. P. Temporal perturbation  
619 of the Wnt signaling pathway in the control of cell reprogramming is modulated by  
620 TCF1. *Stem Cell Reports* **2**, 707-720 (2014).  
621 46 Davis, M. W. ApE - A plasmid editor <https://jorgensen.biology.utah.edu/wayned/apel/>.  
622 47 Becke, C., Haffke, M. & Berger, I. Cre-ACEMBLER Software User Manual. (2012).  
623 48 Cheng, T. *et al.* [Improving baculovirus transduction of mammalian cells by  
624 spinoculation]. *Sheng Wu Gong Cheng Xue Bao* **23**, 546-551 (2007).  
625 49 Lo, W.-H., Chen, C.-Y., Yeh, C.-N., Lin, C.-Y. & Hu, Y.-C. Rapid baculovirus titration  
626 based on regulatable green fluorescent protein expression in mammalian cells. *Enzyme*  
627 *and Microbial Technology* **48**, 13-18 (2011).  
628 50 Kimanius, D., Forsberg, B. O., Scheres, S. H. & Lindahl, E. Accelerated cryo-EM  
629 structure determination with parallelisation using GPUs in RELION-2. *Elife* **5** (2016).  
630 51 Scheres, S. H. W. RELION: Implementation of a Bayesian approach to cryo-EM  
631 structure determination. *Journal of Structural Biology* **180**, 519-530 (2012).  
632

633

634

## 635 **Acknowledgement**

636 We thank all members of the Berger, Schaffitzel and Dillingham teams and our academic and  
637 industrial collaborators for their contributions. We thank Daniel Fitzgerald (Geneva Biotech)  
638 for helpful discussions. We acknowledge generous support from GE Healthcare through a  
639 Discovery Research Grant (to I.B.), from BrisSynBio, a BBSRC/EPSRC Research Centre for  
640 synthetic biology at the University of Bristol (BB/L01386X/1), and from the Max Planck



641 Bristol Centre for Minimal Biology. I.B. is Investigator of the European Research Council  
642 (ERC Advanced Grant DNA-DOCK, Project Nr. 834631).

643

#### 644 **Author contributions**

645 I.B. and F.A. conceived and designed the study with input from C.S. and M.S.D.. F.A.  
646 performed experiments and analysed results. F.A. and M.P. designed, implemented and  
647 validated DNA assembly protocols. C.T. performed protein purification and EM. J.C and P.M.  
648 produced and provided reagents. M.S.D., C.S. and I.B. supervised and guided the research.  
649 F.A. and I.B. wrote the manuscript with input from all authors.

650

#### 651 **Competing interest statement**

652 I.B. declares shareholding in Geneva Biotech Sàrl and is inventor on patents and patent  
653 applications covering DNA methods and baculovirus reagents licensed to Geneva Biotech Sàrl.

654

#### 655 **Additional Information**

656 Supplementary Information contains: Supplementary Methods detailing MultiMate DNA  
657 assembly and MultiMate-HITI-2c safe harbour assembly; Supplementary Tables providing  
658 sequences, gene editing outcomes and genotyping oligonucleotides sequences, cell lines and  
659 antibodies; Supplementary Equation and Supplementary Video.

660

#### 661 **Extended Data Figure Legends**

662 **Extended Data Figure 1. MultiMate assembly protocol and validation. a**, DNA elements  
663 are pasted into four distinct ENTR plasmid modules in between attL/R recombination sites  
664 (coloured triangles). **b**, One DEST module and four ENTR modules are assembled by LR  
665 recombination *in vitro*. DEST plasmids are adapted from MultiBac Acceptor/Donor suite<sup>25,32</sup>.

666 In pMMACE DEST, the homing cassette is attR1-Ccldb-Chlo<sup>R</sup>-attR2, in pMMDS DEST attR1-  
667 Ccldb-Ori<sup>ColE1</sup>-attR2. **c**, After LR reaction, pMMACE DEST and pMMDS DEST are fused by  
668 Cre-recombination. **d**, MultiBac donor plasmids and pMMD DEST vectors can be iteratively  
669 added by Cre recombination, barcoded by resistance makers<sup>26</sup>. **e**, MultiMate plasmid is shuttled  
670 into the MultiBac BV by Tn7-mediated recombination in *E. Coli*. MultiMate and MultiBac  
671 BVs can be further functionalised by *in vitro* Cre-mediated recombination (d-e). **f**, Plasmid  
672 size, number of modules and cargo to prokaryotic backbone DNA ratio (green and grey bars,  
673 respectively) for hypothetical 1.5 kb expression cassettes. **g**, Assembly strategy for MultiMate  
674 plasmid encoding chaperonin CCTs. CCT subunits were pasted into pMMK ENTR plasmid  
675 modules comprising baculoviral promoters (polH, p10), assembled by LR reaction into  
676 pMMACE DEST and pMMDS DEST, fused by Cre and loaded on EMBacY<sup>32</sup> BV. Expression  
677 of MultiMate-CCTs with EMBacY in Sf21 insect cells produces complete CCT/TriC  
678 chaperonin. **h**, Western blot of infected Sf21 cells, uninfected cells as control (ctr) with CCT  
679 subunit specific antibodies. Anti-His was used to detect His-CCT $\alpha$ . **i**, SDS-PAGE analysis of  
680 purified CCT/TriC chaperonin complex. **j**, Negative-stain EM (top) and 2D-class averages  
681 (bottom) of purified CCT/TriC. Scalebar, 100 nm.

682

683 **Extended Data Figure 2. MultiMate assembly for baculovirus-vectored delivery of large**  
684 **multifunctional DNA in human cells.** **a**, MultiMate-Rainbow assembly in a schematic view.  
685 Individual modules in pMMACE, pMMDS DEST and pMMK ENTR as shown (upper panel).  
686 Two LR reactions resulted in MultiMate-5-colours and pMMDS-2-colours (middle panel),  
687 fused by Cre-mediated recombination *in vitro* to produce MultiMate-Rainbow. **b**, Restriction  
688 mapping of five clones each of MultiMate-5-colours (left) pMMDS-2-colours (middle) and  
689 Cre-recombined MultiMate-Rainbow (right) evidences robust assembly. **c**, Confocal images  
690 of HEK293T, HeLa, H4 and SH-SY5Y cells 48 hours after transduction with MultiMate-5-

691 colours VSV-G pseudotyped BV<sup>19</sup>. Scalebar, 20  $\mu$ m. **d**, Schematic representation of  
692 MultiMate-CellCycle assembly. Individual modules were pasted in pMMACE and pMMK  
693 ENTR plasmids (upper panel). **e**, Restriction mapping of five clones each after LR  
694 recombination. **f**, Confocal microscopy of HEK293T, SH-SY5Y, HeLa and H4 cells at 48  
695 hours after transduction with MutiMate-CellCycle VSV-G pseudotyped BV. Scalebar, 100  $\mu$ m.  
696

697 **Extended Data Figure 3. Baculovirus-vectored delivery of complete multicomponent**  
698 **CRISPR/Cas9 toolkits for homology independent targeted integration (HITI) in human**  
699 **cells, continued. a-c**, HEK293T cells transfected with MultiMate-HDR or HITI-2c all-in-one  
700 plasmids in the absence of puromycin selection at three- or 14-days post transfection. **a**,  
701 representative flow-cytometry plots; **b**, Histograms of absolute (left) and relative (right) gene  
702 editing efficiencies. Flow-cytometry data of n = 3 independent biological replicates.  
703 \*\*\*P<0.001, Student's t-test. Relative gene editing efficiency is calculated as the % of  
704 mCherry+ cells over the % of eGFP+ cells. **c**, Confocal microscopy of HEK293T at two-days  
705 post transfection with MultiMate-HDR or MultiMate-HITI-2c plasmids. Scalebar, 50  $\mu$ m. **d**,  
706 Representative flow-cytometry histograms of HEK293T transfected with MultiMate-HDR or  
707 MultiMate-HITI-2c after puromycin selection. **e**, Genotype PCR of HEK293T transfected  
708 (upper panel) or transduced (lower panel) with MultiMate-HDR or MultiMate-HITI-2c after  
709 puromycin selection. **f**, Widefield microscopy images of live HEK293T transfected with  
710 MultiMate-HDR or MultiMate-HITI-2c plasmids after puromycin selection. Scalebar, 100  $\mu$ m.  
711 **g**, Western blot of total protein extracts from puromycin selected HEK293T transfected with  
712 MultiMate-HDR, MultiMate-HITI-2c and untransfected HEK293T as a control (ctr). Anti- $\beta$ -  
713 actin antibody was used in top panel, with anti-TUBULIN as a loading control. **h**,  
714 Representative confocal images of HEK293T, HeLa, H4 and SH-SY5Y human cells 72 hours  
715 after transduction with MultiMate-HDR or HITI-2c BV. Scalebar, 50  $\mu$ m. **i**, Representative

716 flow-cytometry plots of HEK293T, HeLa, H4 and SH-SY5Y cells at three-days post  
717 transduction with MultiMate-HITI-2c BV, untransduced parental cell lines as a control (ctr).

718

719 **Extended Data Figure 4. Baculovirus-vectored safe-harbour homology-independent**  
720 **integration of large DNA cargoes in human genomes, continued. a-b**, Delivery efficiencies  
721 of indicated MultiMate-HITI-2c plasmids by transfection (a) or low-titer BV transduction (b)  
722 in HEK293T at three-days post transfection/transduction. **c-d**, Absolute gene editing  
723 efficiencies of HEK293T at three-days post transfection (c) or low-titer BV transduction (d)  
724 with the indicated MultiMate-HITI-2c plasmids. Mean  $\pm$  s.d. of  $n = 3$  independent biological  
725 replicates. Dots and triangles represent total MultiMate plasmid and HITI-2c payload DNA  
726 sizes, respectively. **e-f**, Representative flow-cytometry histograms of HEK293T transduced  
727 with the indicated MultiMate-HITI-2c BVs and selected with puromycin or  
728 puromycin/hygromycin for mCherry expression (e) or eGFP/EYFP expression (f).

729

730 **Extended Data Figure 5. Highly efficient and indels-free prime-editing by using**  
731 **MultiMate all-in-one BV, continued a**, Restriction mapping of five randomly picked  
732 MultiMate-PE2 clones. **b**, Confocal microscopy images of HEK293T two-days after  
733 transfection with MultiMate-PE2 plasmid. **c**, Representative genotype PCR Sanger sequencing  
734 of HEK293T four-days after transfection with MultiMate-PE2 and relative sequences  
735 contribution after Sanger sequencing deconvolution (ICE). Mean  $\pm$  s.d. of  $n = 3$  independent  
736 biological replicates. **d**, Visual summary of BV amplification. V0: widefield images of Sf21  
737 cells in 6-well plates after initial transfection with MultiMate-PE2 BV DNA and control cells  
738 (untransfected). All transfected cells show VSV-G induced syncytia. V2: aeBlue expression in  
739 suspension culture (upper panel) and centrifuged pellets (lower panel) of Sf21 cells during  
740 amplification of MultiMate-PE2 BVs. **e**, Confocal microscopy images of HeLa, RPE-1

741 hTERT, HEK293T and SH-SY5Y at 24-hours post transduction with MultiMate-PE2 BV. **f**,  
742 Representative flow-cytometry histograms of mTagBFP expression in HEK293T at 24-hours  
743 post transduction. Dotted lines represent gating. **g**, Transduction efficiencies of HEK293T at  
744 24-hours post-transduction with the indicated dilutions of MultiMate-PE2 BV. Mean  $\pm$  s.d. of  
745  $n = 5$  independent biological replicates. **h**, Sanger sequencing comparisons of of *HEK3* locus  
746 in HEK293T six days after transduction with the indicated amounts of MultiMate-PE2 BV. **i**,  
747 Percentage of correct editing (CTT insertion) in HEK293T six days post transduction with the  
748 indicated amounts of MultiMate-PE2 BV. Data are derived from Sanger sequencing  
749 deconvolution (ICE), no indels were detected in any of the conditions. Mean  $\pm$  s.d. of  $n = 3$   
750 independent biological replicates.

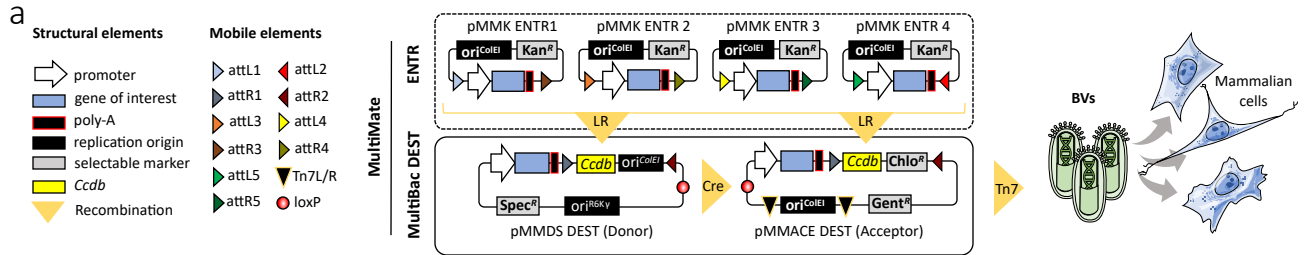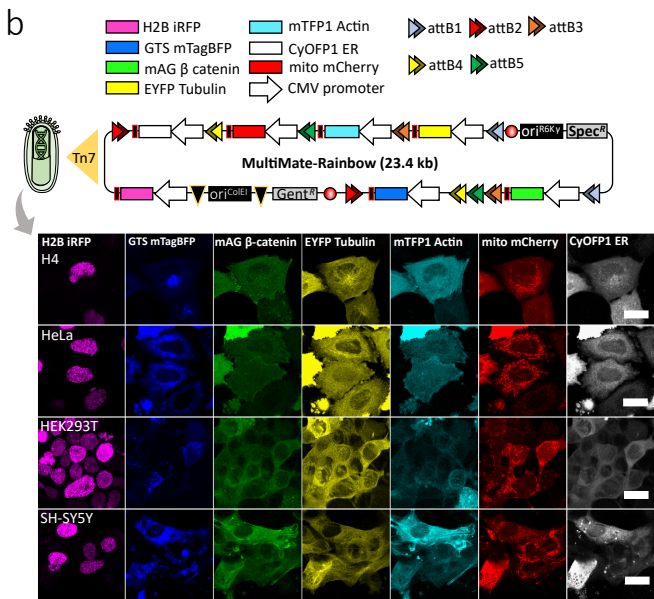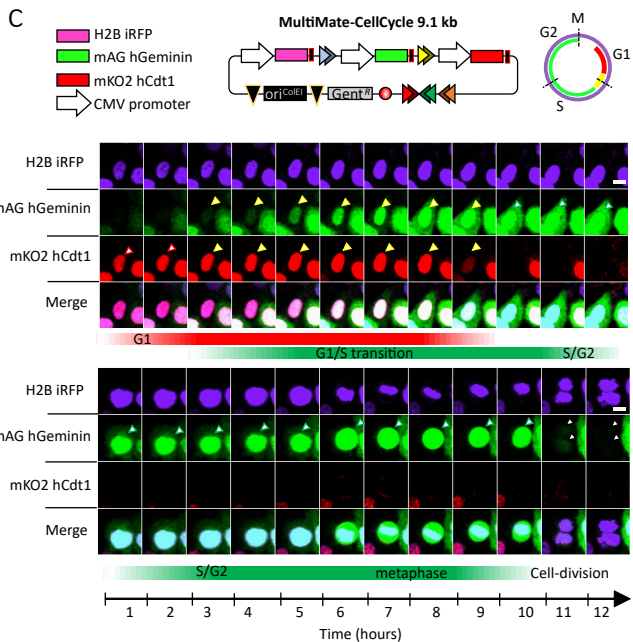

Fig1\_AulicinoBerger

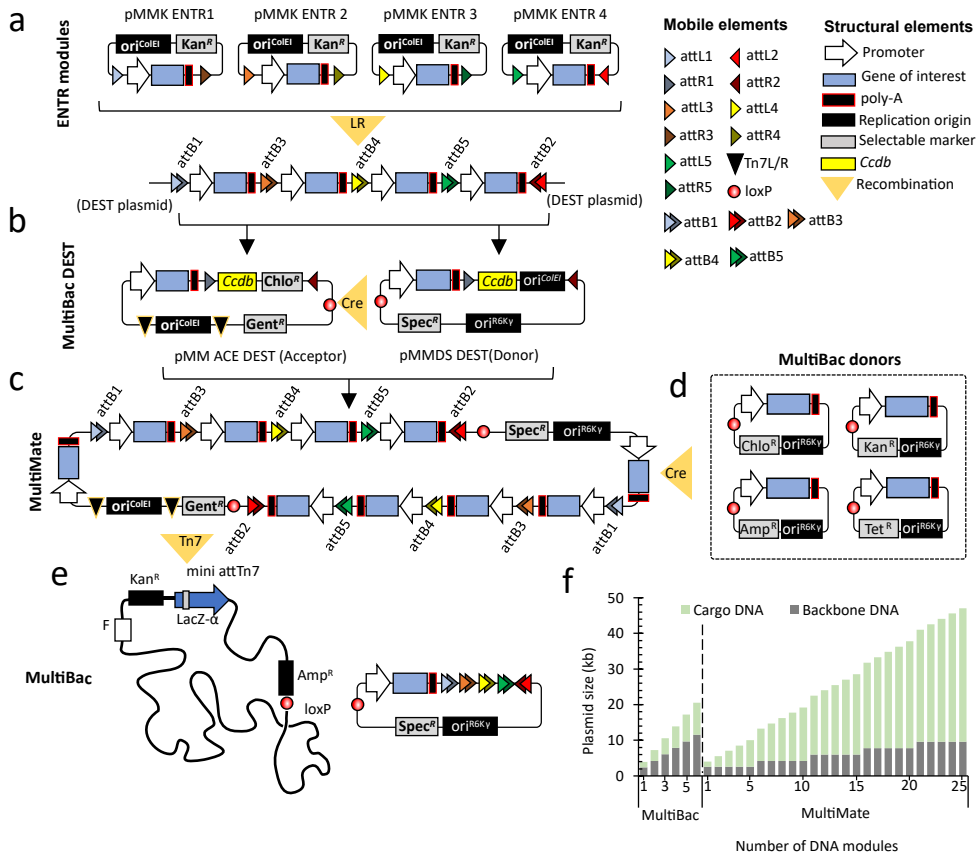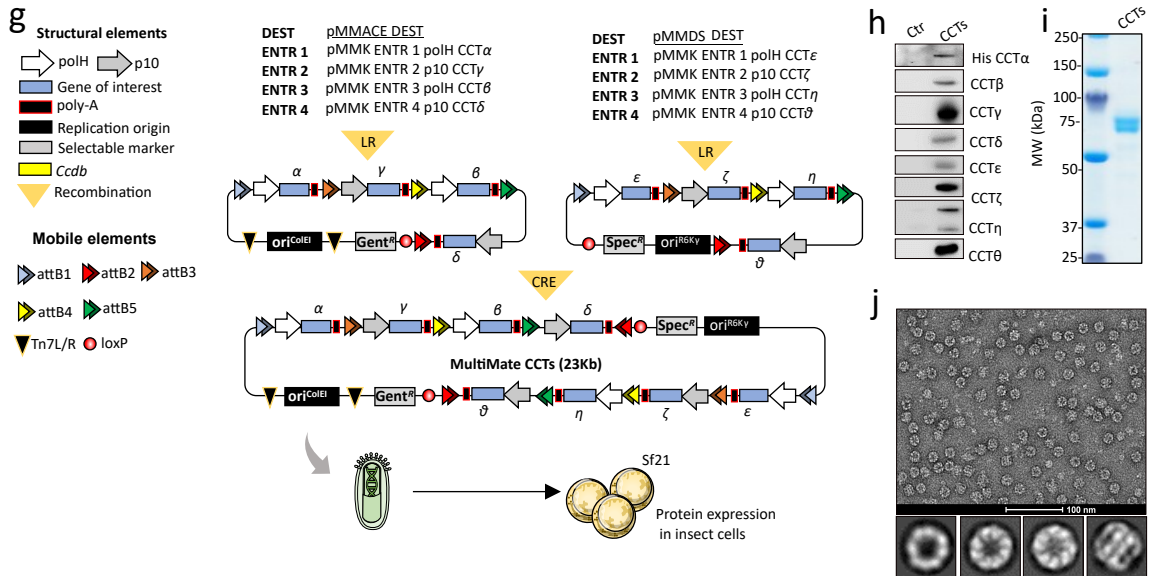

ExtDataFig1\_AulicinoBerger

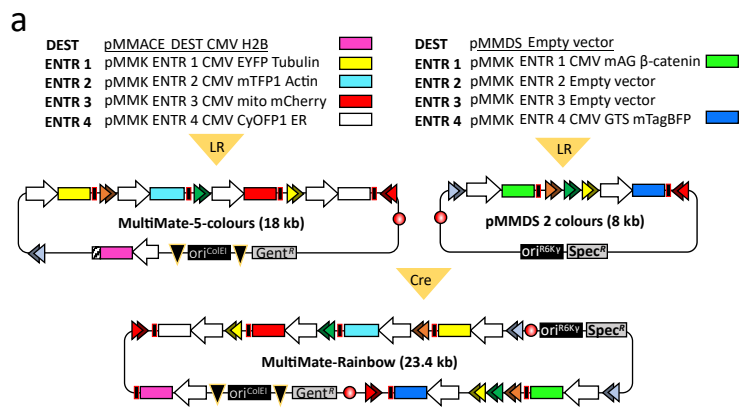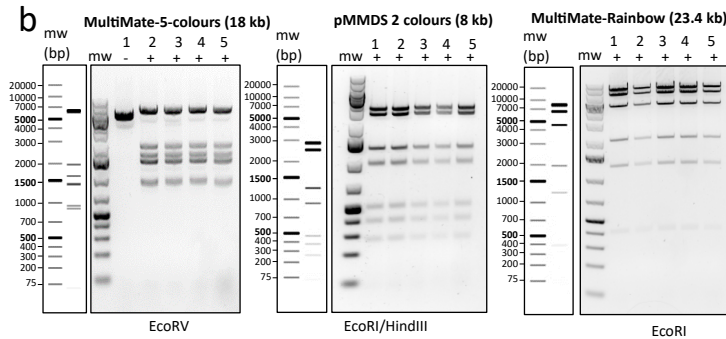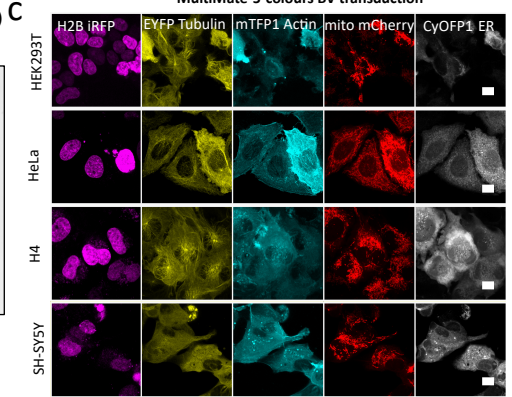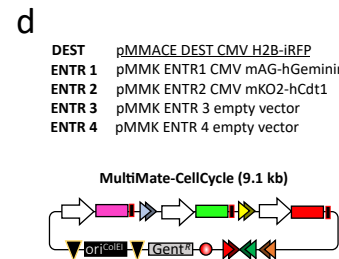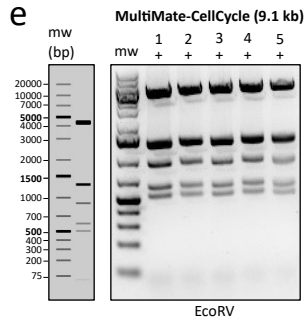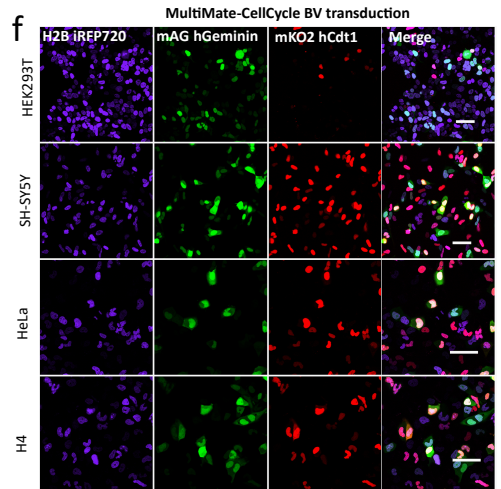



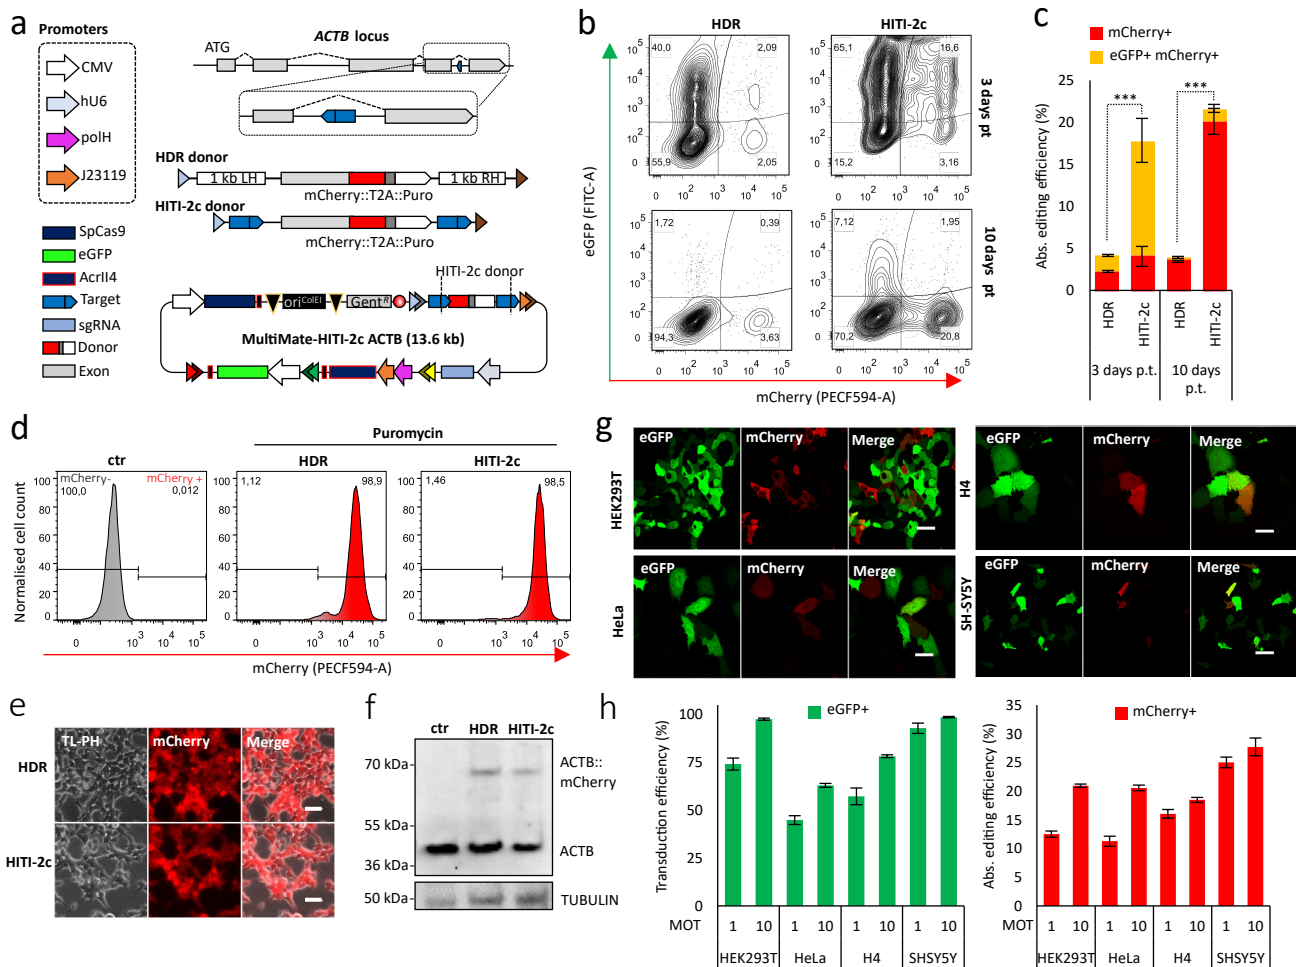

Fig2\_AulicinoBerger

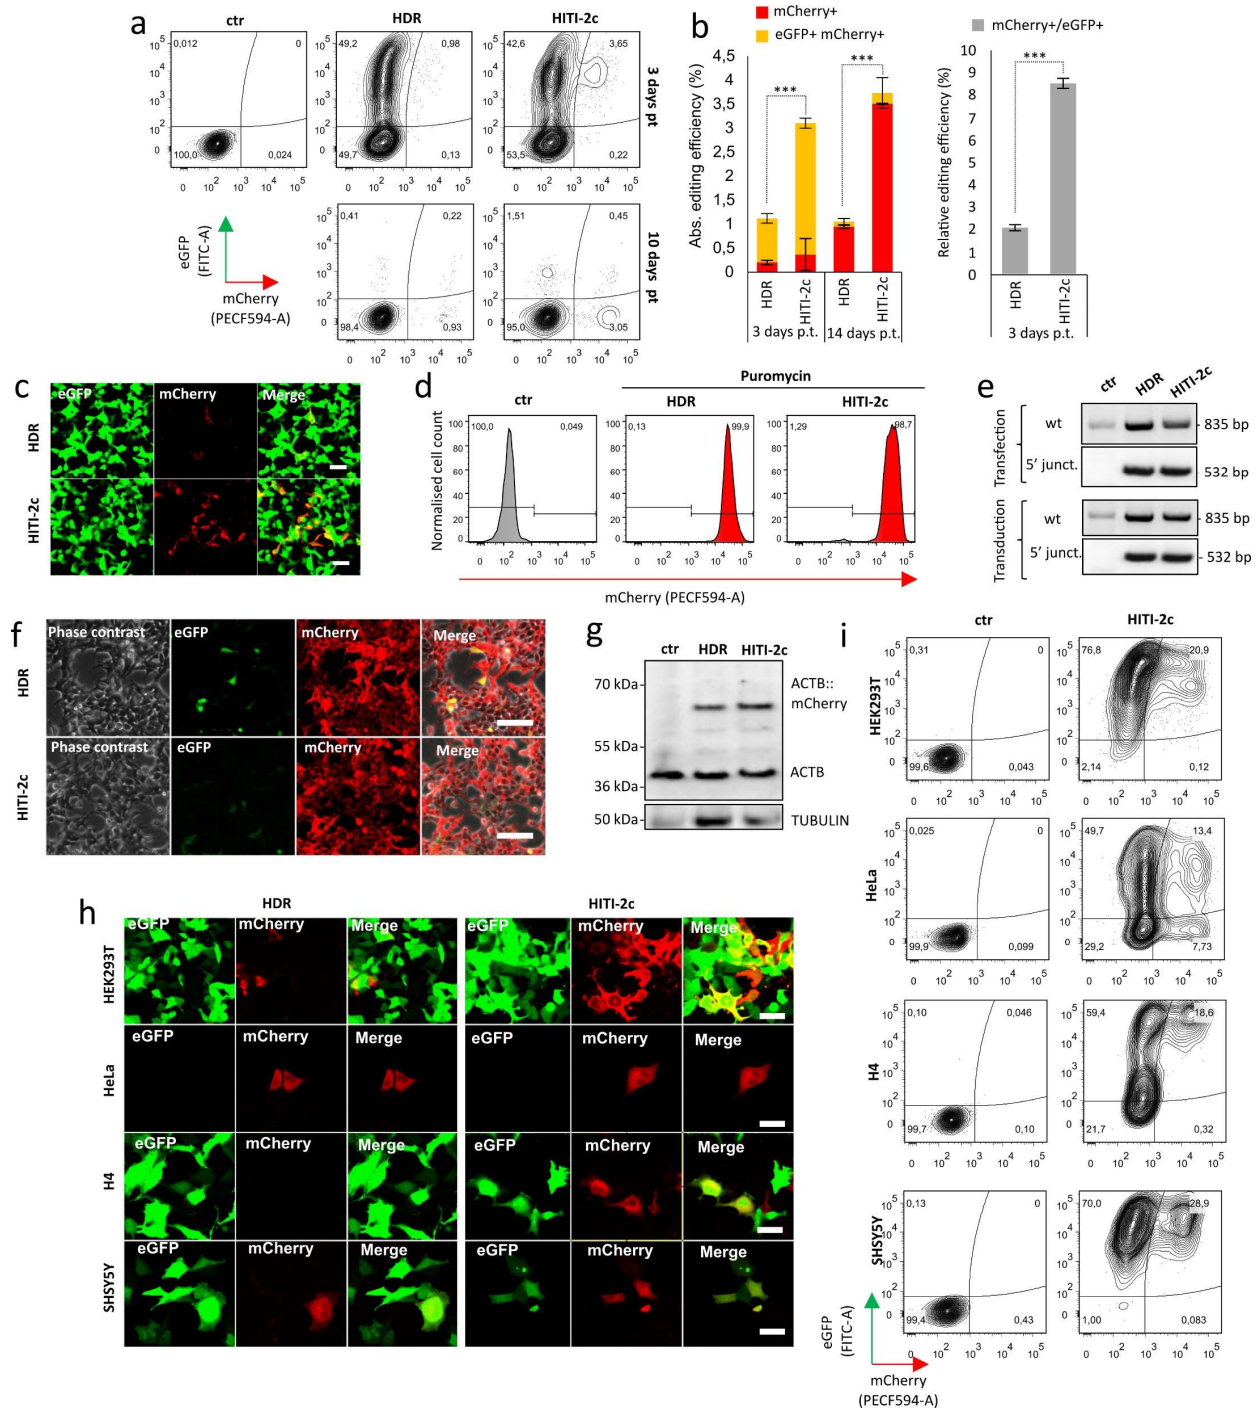

ExtDataFig3\_AulicinoBerger

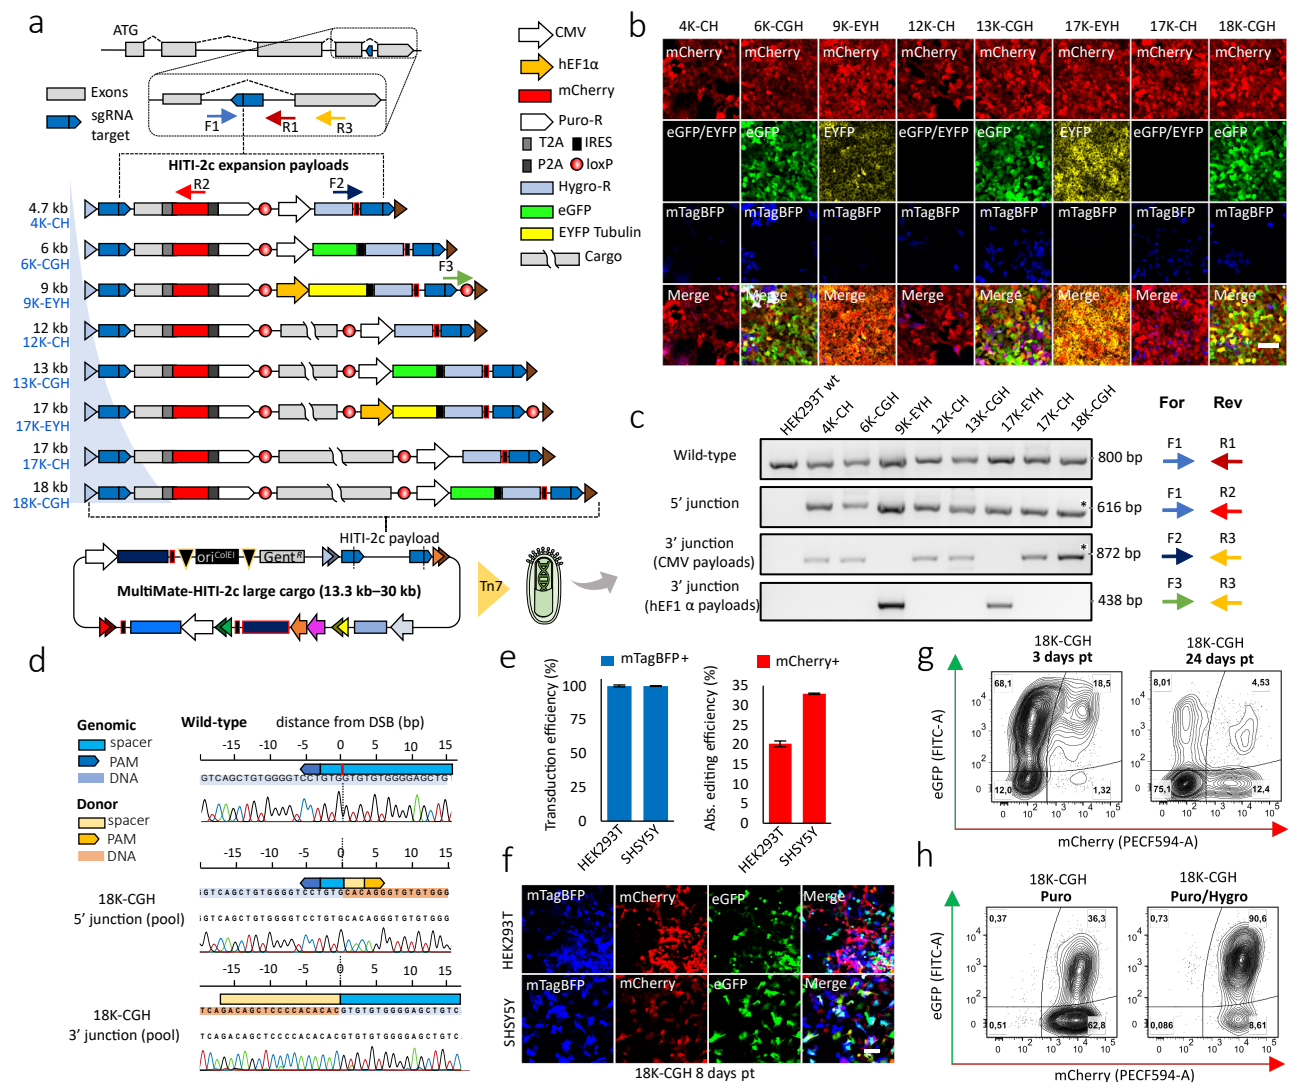

Fig3\_AulicinoBerger

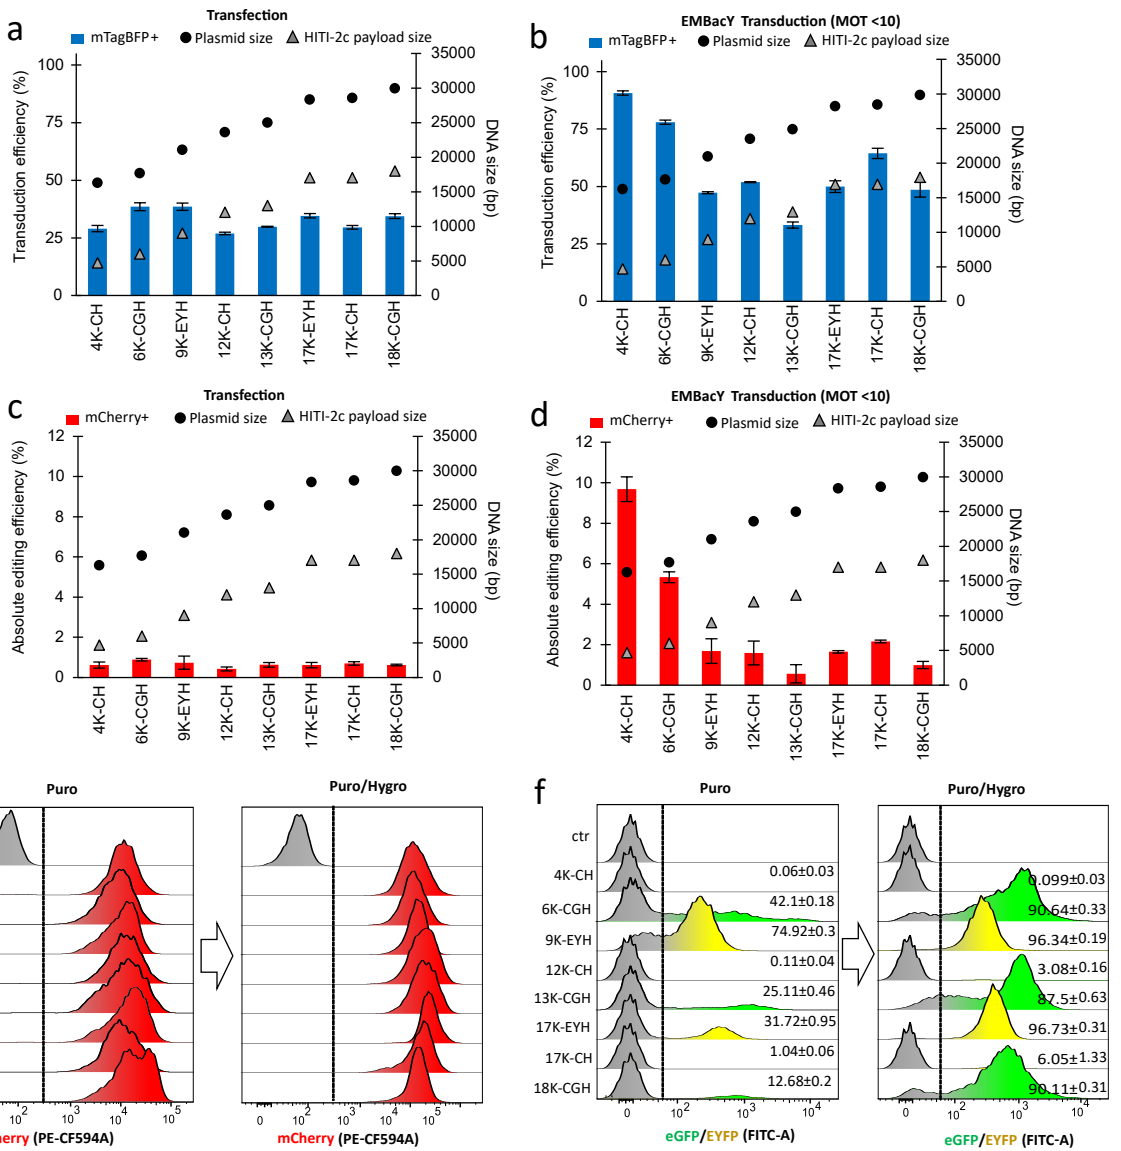

ExtDataFig4\_AulicinoBerger

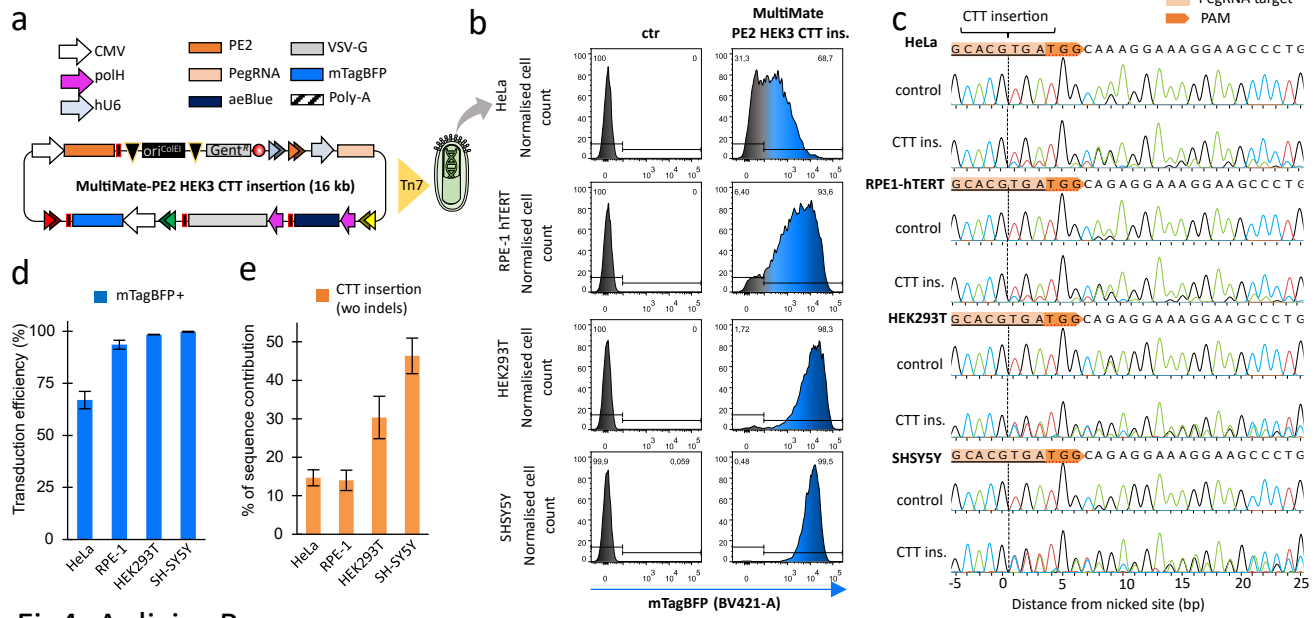

Fig4\_AulicinoBerger

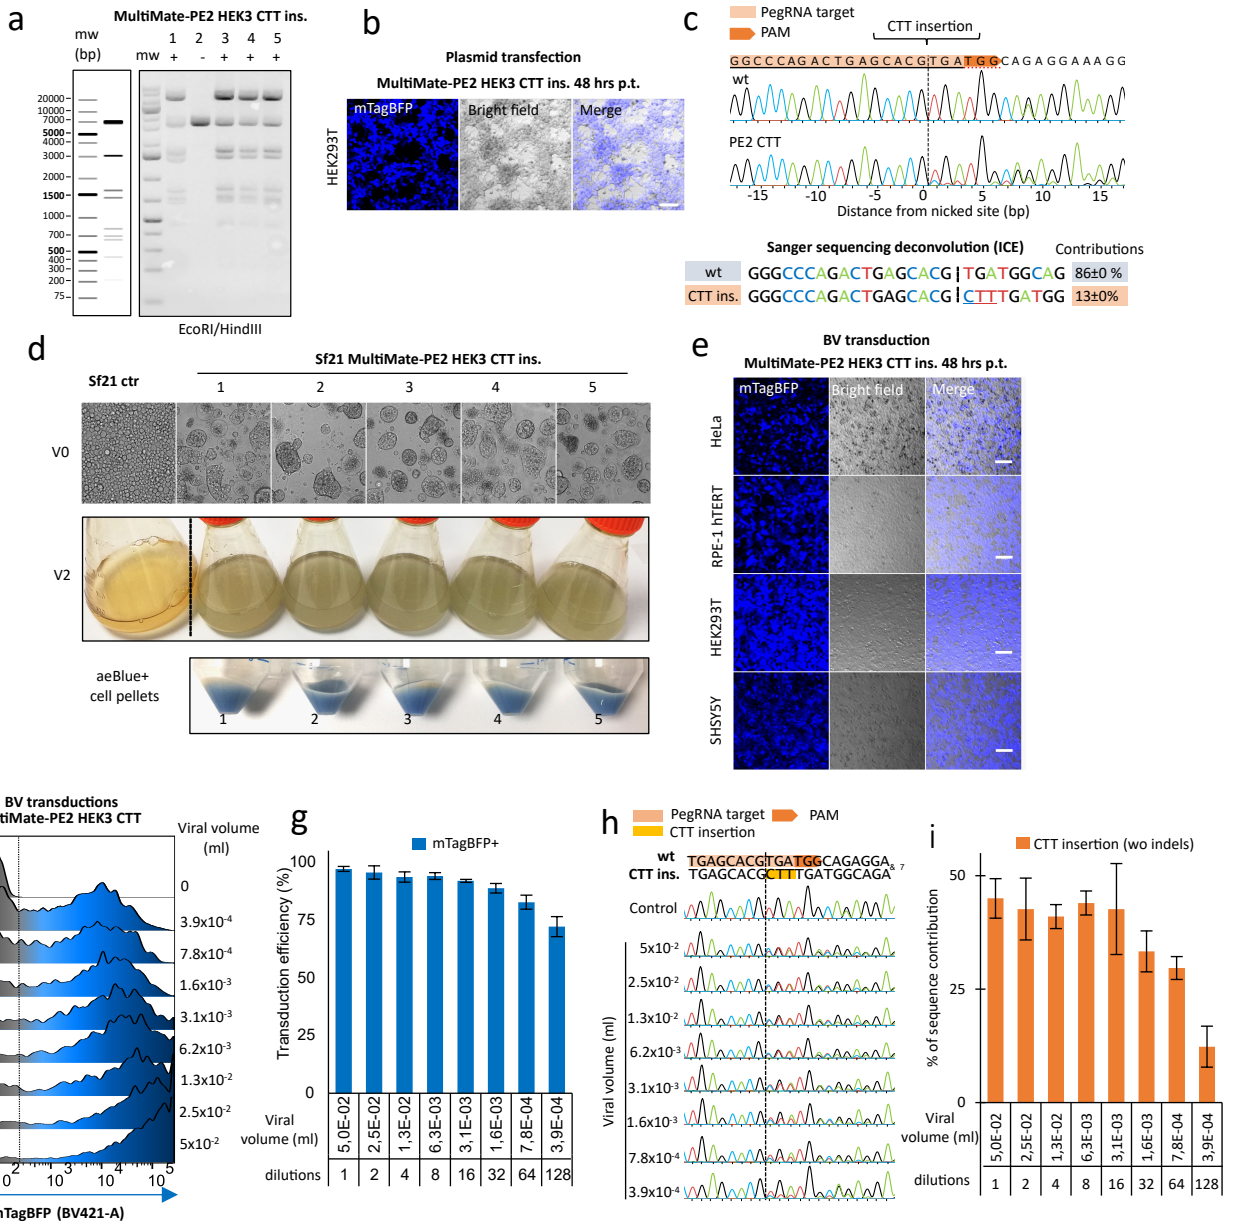

ExtDataFig5\_AulicinoBerger
